1 **Elevated Neuropeptide Y1 Receptor Signaling Contributes to  $\beta$ -cell Dysfunction and**  
2 **Failure in Type 2 Diabetes**

3  
4 Chieh-Hsin Yang<sup>1\*</sup>, Danise Ann-Onda<sup>1</sup>, Xuzhu Lin<sup>1</sup>, Stacey Fynch<sup>1</sup>, Shaktypreya Nadarajah<sup>1</sup>,  
5 Evan Pappas<sup>1</sup>, Xin Liu<sup>1</sup>, John W. Scott<sup>1,2,3</sup>, Jonathan S. Oakhill<sup>1,2,4</sup>, Sandra Galic<sup>1,4</sup>, Yanchuan  
6 Shi<sup>5,6</sup>, Alba Moreno-Asso<sup>7,8</sup>, Cassandra Smith<sup>7,8</sup>, Tom Loudovaris<sup>1,4</sup>, Itamar Levinger<sup>7,8</sup>, Decio  
7 L. Eizirik<sup>9,10</sup>, Ross D. Laybutt<sup>5,6</sup>, Herbert Herzog<sup>5,6</sup>, Helen, E. Thomas<sup>1,4</sup>, Kim Loh<sup>1,4\*</sup>

8  
9 <sup>1</sup>St. Vincent's Institute of Medical Research, Fitzroy, VIC, 3065, Australia

10 <sup>2</sup>Mary MacKillop Institute for Health Research, Australian Catholic University, Melbourne  
11 VIC, 3000, Australia

12 <sup>3</sup>The Florey Institute of Neuroscience and Mental Health, Parkville, VIC, 3052, Australia

13 <sup>4</sup>Department of Medicine, University of Melbourne, Fitzroy, VIC, 3065, Australia

14 <sup>5</sup>Garvan Institute of Medical Research, St Vincent's Hospital, Sydney, 2010, Australia.

15 <sup>6</sup>Faculty of Medicine, UNSW Australia, Sydney, 2052, Australia.

16 <sup>7</sup>Institute of Health and Sport (IHES), Victoria University, Footscray, VIC, Australia

17 <sup>8</sup>Australian Institute for Musculoskeletal Science (AIMSS), University of Melbourne and  
18 Western Health, St Albans, VIC Australia

19 <sup>9</sup>ULB Center for Diabetes Research, Medical Faculty, Universite Libre de Bruxelles (ULB),  
20 Brussels, Belgium

21 <sup>10</sup>Indiana Biosciences Research Institute (IBRI), Indianapolis, Indiana, USA

22  
23 **\*Corresponding authors:**

24 Kim Loh, PhD  
25 Head, Diabetes and Metabolic Disease laboratory  
26 St. Vincent's Institute of Medical Research  
27 9 Princes Street  
28 Fitzroy, VIC, 3065, Australia  
29 Tel: +61 (0)3-92312490  
30 E-mail: kloh@svi.edu.au

31  
32 Chieh-Hsin Yang, PhD  
33 St. Vincent's Institute of Medical Research  
34 9 Princes Street  
35 Fitzroy, VIC, 3065, Australia  
36 Tel: +61 (0)3-92312490  
37 E-mail: jyang@svi.edu.au

38

39 **ABSTRACT**

40

41 Loss of functional  $\beta$ -cell mass is a key factor contributing to the poor glycaemic control in type

42 2 diabetes. However, therapies that directly target these underlying processes remains lacking.

43 Here we demonstrate that gene expression of neuropeptide Y1 receptor and its ligand,

44 neuropeptide Y, was significantly upregulated in human islets from subjects with type 2

45 diabetes. Importantly, the reduced insulin secretion in type 2 diabetes was associated with

46 increased neuropeptide Y and Y1 receptor expression in human islets. Consistently,

47 pharmacological inhibition of Y1 receptors by BIBO3304 significantly protected  $\beta$ -cells from

48 dysfunction and death under multiple diabetogenic conditions in islets. In a preclinical study,

49 Y1 receptor antagonist BIBO3304 treatment improved  $\beta$ -cell function and preserved functional

50  $\beta$ -cell mass, thereby resulting in better glycaemic control in both high-fat-diet/multiple low-

51 dose streptozotocin- and *db/db* type 2 diabetic mice. Collectively, our results uncovered a novel

52 causal link of increased islet NPY-Y1 receptor signaling to  $\beta$ -cell dysfunction and failure in

53 human type 2 diabetes. These results further demonstrate that inhibition of Y1 receptor by

54 BIBO3304 represents a novel and effective  $\beta$ -cell protective therapy for improving functional

55  $\beta$ -cell mass and glycaemic control in type 2 diabetes.

56

57

58

59

60

61

62

63 **Keywords:** NPY/  $\beta$ -cell/insulin secretion/Y1 receptor/type 2 diabetes

64

## 65 INTRODUCTION

66

67 The prevalence of diabetes has been increasing over the last few decades and is now a major  
68 health concern worldwide [1]. It is a major cause of premature mortality and other health  
69 complications such as cardiovascular disease and chronic kidney disease [2, 3]. Located within  
70 the islets of Langerhans, pancreatic  $\beta$ -cells synthesize the hormone insulin, which is secreted  
71 primarily in response to elevated blood glucose levels. Type 2 diabetes (T2D) is the result of  
72 insufficient production of the glucose-lowering hormone insulin [4, 5], triggered by multiple  
73 factors. Peripheral insulin resistance, coupled with diabetogenic stressors including  
74 hyperlipidaemia, endoplasmic reticulum (ER), oxidative stresses and inflammation are  
75 recognised as major driving forces of  $\beta$ -cell dysfunction and death, which ultimately leads to  
76 or exacerbates hyperglycaemia, a key hallmark of T2D [6-8]. Current therapies for the  
77 treatment of T2D are mainly focused on improving glycaemic control through increased insulin  
78 secretion from the  $\beta$ -cell and/or the improvement of insulin sensitivity. While T2D  
79 management has improved over the years, the search for a novel agent that can selectively  
80 improve  $\beta$ -cell function together with the preservation of  $\beta$ -cell mass remains ongoing.

81

82 The neuropeptide Y system consists of neuropeptide Y (NPY), peptide-YY (PYY) and  
83 pancreatic polypeptide (PP), are a group of short (36-amino acid) peptides that play a key role  
84 in the regulation of energy homeostasis [9, 10]. While NPY centrally promotes feeding and  
85 reduces energy expenditure, PYY and PP mediate satiety [9, 10]. The NPY system exerts its  
86 biological actions via a set of G-protein-coupled receptors (GPCR), of which five have been  
87 cloned: Y1, Y2, Y4, Y5, and y6 [9, 10]. The NPY system is widely expressed in the central  
88 nervous system as well as in peripheral tissues [9, 10]. In the pancreas, while PYY and PP are  
89 expressed by  $\alpha$ -cells and pancreatic PP cells, respectively, recent studies have demonstrated  
90 that NPY expression in mouse islet  $\beta$ -cells may play a role in altered  $\beta$ -cell function that

91 precedes to diabetes onset [10, 11]. Interestingly, NPY levels were significantly upregulated in  
92 response to oxidative stress in islets from subjects with T2D [11]. Furthermore, NPY-deficient  
93 mice exhibit enhanced insulin secretion in response to glucose administration [12]. This is  
94 further confirmed by *in vitro* studies demonstrating that application of NPY decreases glucose-  
95 stimulated insulin secretion from mouse islets [12]. Together, these results suggest that NPY  
96 may act through a paracrine mechanism to tonically suppress  $\beta$ -cell function.

97

98 In addition to the brain, we previously identified that neuropeptide Y1 receptor is also  
99 expressed in mouse and human  $\beta$ -cells and acts as a critical negative regulator of  $\beta$ -cell function  
100 [10, 13, 14]. Like all Y-receptors, the Y1 receptor is a GPCR that preferentially associates with  
101 Gi/o G-protein and therefore acts in an inhibitory fashion reducing cyclic AMP (cAMP) levels.  
102 Indeed, we have shown that pharmacological inhibition of this receptor using a Y1 receptor  
103 specific antagonist, BIBO3304, significantly enhances  $\beta$ -cell function via a cAMP-dependent  
104 mechanism in mouse and human islets [13]. In addition, we demonstrated that BIBO3304  
105 delays the onset of T1D and may also be useful in boosting  $\beta$ -cell function under conditions  
106 where insulin secretion is limited such as during islet transplantation [13]. However, the  
107 beneficial effects of pharmacological inhibition of the Y1 receptor in T2D remain unknown.  
108 Here, we show in proof-of-concept studies that Y1 receptor antagonist BIBO3304 acts as a  $\beta$ -  
109 cell protective agent. BIBO3304 treatment significantly improved glycaemic control in the  
110 high-fat diet/multiple low-doses streptozotocin-induced and obese leptin receptor deficient  
111 (*db/db*) T2D mouse models. Importantly, our findings have direct relevance to the clinical  
112 setting of T2D, since BIBO3304 exhibited equal efficacy in improving glycaemic control as  
113 the first line oral anti-diabetic drug, metformin.

114

115

116 **RESULTS**

117

118 **Increased NPY and Y1 receptor levels in T2D islets are associated with reduced insulin**  
119 **secretion.**

120 To investigate whether the NPY system in pancreatic islets is associated with reduced  $\beta$ -cell  
121 function in the pathogenesis of T2D, we first determined the NPY system expression profiles  
122 in human islets isolated from non-diabetic and T2D subjects as described **Methods and**  
123 **Supplementary Data**. Interestingly, we found that in islets from diabetic donors, the  
124 expression of *NPY* and its receptor *NPY1R* was increased by 2.7- and 2.5-fold, respectively, as  
125 compared to the non-diabetic donors (**Figure 1A and 1B**). Importantly, the increased *NPY* and  
126 *NPY1R* mRNA expression in human islets correlated with reduced insulin secretion as  
127 indicated by the insulin stimulation index (Spearman's  $r=0.7151$ ,  $p=0.0376$  and  $r=0.6524$ ,  
128  $p=0.0473$ ) (**Figure 1C and 1E**), whereas the differential expression of *NPY* and *NPY1R* was  
129 not associated with HbA1c (**Figure 1D and 1F**) or BMI (**Figure S1A and S1B**). These results  
130 suggests that elevated NPY/Y1 receptor signaling may contribute to impaired insulin secretion  
131 in human with T2D.

132

133 On the other hand, the basal levels of *NPY2R*, *PPYR1* (also known as *NPY4R*) and *NPY5R* were  
134 very low in pancreatic islets (**Figure 1B**), suggesting that these Y receptors are unlikely to play  
135 a major role in mediating NPY function in human pancreatic islets. Despite the low level of  
136 expression, *NPY5R* was also moderately upregulated in islets of T2D subjects (**Figure 1B**), but  
137 there was no significant correlation between *NPY5R* expression and insulin stimulation index,  
138 HbA1c (**Figure 1G and 1H**) or BMI (**Figure S1C**). Importantly, the NPY/Y1 receptor axis  
139 appeared to be exclusively up-regulated as there were no noticeable changes in other NPY  
140 ligands such as *PYY* and *PPY* and their correlation with insulin stimulation index or HbA1c

141 **(Figure S1D-II)**. Collectively, these results uncover a novel link between increased islet  
142 NPY/Y1 receptor signaling and  $\beta$ -cell dysfunction in human T2D.

143

144 **Y1 receptor inhibition restores  $\beta$ -cell function and protects against  $\beta$ -cells apoptosis**  
145 **under diabetogenic conditions.**

146 Diabetogenic stresses such as inflammation, ER stress, oxidative stress and glucolipototoxicity  
147 have been implicated as key factors contributing to impaired  $\beta$ -cell function and death in T2D  
148 [15-17]. Given that islet NPY/Y1 receptor levels negatively correlate with insulin stimulation  
149 index in human T2D, we next asked whether pharmacological inhibition of NPY/Y1 receptor  
150 signalling by a selective Y1 receptor antagonist BIBO3304, under diabetogenic conditions,  
151 would restore  $\beta$ -cell function. To test this, we assessed glucose-stimulated insulin secretion  
152 (GSIS) with or without BIBO3304 on wild-type C57BL/6 islets that were exposed to various  
153 stress conditions (inflammation: proinflammatory cytokines TNF $\alpha$ , IFN $\gamma$  and IL1 $\beta$ ; ER stress:  
154 thapsigargin; oxidative stress: H<sub>2</sub>O<sub>2</sub>; glucolipototoxicity: high glucose/palmitate). A significant  
155 reduction in insulin release in response to glucose stimulation was observed in islets that were  
156 exposed to inflammatory cytokines (**Figure 2A**), ER-stress (**Figure 2B**) or H<sub>2</sub>O<sub>2</sub> (**Figure S2A**).  
157 In contrast, BIBO3304 co-treatment prevented the impaired insulin release that was induced  
158 by proinflammatory cytokines or ER stress inducer, thapsigargin (**Figure 2A and 2B**) with the  
159 same trend observed in high glucose/palmitate and oxidative stress (**Figure S2A**) treated islets.  
160 Taken together, these results demonstrate that, under diabetogenic stress conditions such as  
161 inflammation and ER stress, Y1 receptor antagonism can directly restore  $\beta$ -cell function by  
162 enhancing GSIS.

163

164 Targeting  $\beta$ -cell preservation is a key component of therapeutic strategies for glycaemic control  
165 in diabetes [18]. We next investigated whether inhibition of Y1 receptor could also protect  $\beta$ -

166 cells from failure under diabetogenic conditions by exposing islets to various stress conditions  
167 with or without the treatment of Y1 receptor antagonist BIBO3304. Cell death was measured  
168 using propidium iodide staining and analysis of the sub-diploid DNA content by flow  
169 cytometry. As expected, chronic exposure to all diabetogenic stressors induced a substantial  
170 increase in  $\beta$ -cell apoptosis (**Figure 2C, 2D and 2E**). In contrast, BIBO3304 significantly  
171 reduced cytokine, thapsigargin and H<sub>2</sub>O<sub>2</sub>-induced cell death (**Figure 2C, 2D and 2E**), but not  
172 glucolipotoxicity-induced cell death (**Figure S2B**), as indicated by decreased subdiploid DNA  
173 content. Given that the pathogenesis of T2D is the result of complex metabolic perturbations,  
174 islets cultured with individual diabetogenic stress alone may have a limited ability to model  
175 the islet microenvironment in T2D. We therefore tested the ability of BIBO3304 to protect  $\beta$ -  
176 cells from death in islets isolated from severely diabetic *db/db* mice (random blood glucose  
177 (RBG) 27.5±1.84 mmol/L; body weight (BW) 42.4±1.56 g, n=13) compared to their non-  
178 diabetic littermate control *db/+* mice (RBG 10.5±0.4 mmol/L; BW 24.5±1.16 g, n=9). Our  
179 results showed that the addition of BIBO3304 for 36 h alleviated  $\beta$ -cell apoptosis in *db/db* islets  
180 as evidenced by significant reduction in the expression of pro-apoptotic markers such as BIM  
181 and cleaved-Caspase-3 (**Figure 2F and 2G**). Taken together, these results suggest that the  
182 direct inhibition of Y1 receptor signalling in islets was associated with reduced apoptosis,  
183 indicating that Y1 receptor antagonism plays a protective role in preserving  $\beta$ -cell mass and  
184 function in T2D.

185

### 186 **Inhibition of Y1 receptor restores normoglycaemia in high fat diet (HFD) and** 187 **streptozotocin (STZ)-induced T2D mouse model.**

188 While pharmacological inhibition of Y1 receptor restored  $\beta$ -cell function and decreased  $\beta$ -cell  
189 death *ex vivo*, we next investigated whether BIBO3304 could improve glycaemic control in the  
190 context of a non-genetic animal model of human adult-onset T2D that displays hyperglycaemia

191 and  $\beta$ -cell dysfunction. To test this, C57BL/6 mice were rendered diabetic by HFD diet feeding  
192 for 4 weeks and followed by injection with multiple low-dose streptozotocin (STZ) to induce  
193 partial  $\beta$ -cell loss. Diabetic HFD/STZ mice were subsequently treated with placebo or  
194 BIBO3304 for up to 6 weeks to assess its ability to restore normoglycemia (**Figure 3A**).  
195 Significant hyperglycaemia (blood glucose >15 mmol/L) established 7 days after STZ  
196 treatment (**Figure 3B**). Body weight, adiposity and food intake were comparable between  
197 BIBO3304 and placebo treated group (**Figure S3A-S3H**). Importantly, however, BIBO3304  
198 treated mice displayed significantly lower blood glucose levels during the entire 4 weeks of  
199 the study when compared to the placebo group (**Figure 3B**). Fed and fasted blood glucose  
200 levels were also significantly reduced in BIBO3304-treated mice (**Figure 3C**). The reduced  
201 blood glucose levels were unlikely due to an increase in urinary glucose excretion as urine  
202 glucose was 2-3 folds lower in BIBO3304 treated mice than in placebo group (**Figure 3D**). To  
203 compare the effects of BIBO3304 with a currently available oral anti-diabetic drug, we tested  
204 the effects of metformin, the first-line and most widely prescribed drug for the treatment of  
205 T2D. Metformin treatment resulted in improved blood glucose levels in HFD/STZ diabetic  
206 mice (**Figure 3E**) and was not significantly different to the improvement in glycaemic control  
207 by BIBO3304 (**Figure 3E**).

208  
209 Consistent with the improved glycaemic control, glucose tolerance was also significantly  
210 improved in mice that received BIBO3304 treatment, which was due to the enhanced *in vivo*  
211 insulin secretory response (**Figure 3F and 3I**). On the other hand, BIBO3304 treatment had  
212 no influence on hepatic glucose production or insulin responsiveness *in vivo* or *ex vivo* (**Figure**  
213 **3G, 3H and 3I**). The improvement in glycaemic control by BIBO3304 treatment was not  
214 evident in mice receiving high doses of STZ, a model in which the majority of  $\beta$ -cells are lost  
215 (**Figure 3J**). Importantly, this suggests that the anti-diabetic effect of Y1 receptor antagonist



216 BIBO3304 is dependent on the improvement of the functional  $\beta$ -cell mass. In line with this,  
217 there was a significant increase in islet numbers in pancreas from HFD/STZ mice receiving 4-  
218 week of BIBO3304 treatment (**Figure 3K and 3L**), while pancreas weights (**Figure S3J**)  
219 remained comparable. While islets from BIBO3304-treated mice were similar in size to the  
220 one in the placebo group, the total islet area was significantly greater in the BIBO3304-treated  
221 mice, due to an increase in islet number (**Figure 3M & N**). Collectively, these results suggest  
222 Y1 receptor antagonism may be clinically beneficial to improve glycaemic control in T2D by  
223 improving functional  $\beta$ -cell mass.

224

225 **Y1 receptor antagonism improves insulin responsiveness and  $\beta$ -cell function at various**  
226 **stages of diabetes progression.**

227 Genetically diabetic leptin receptor-deficient *db/db* mice are obese, insulin resistant, and  
228 display hyperglycaemia at an early age and transition from  $\beta$ -cell compensation to failure with  
229 a pathophysiological sequence of events similar to human T2D [19]. To test the effects of  
230 BIBO3304 on glycaemic control also in *db/db* mice, we chose an early (4-10 weeks old) and a  
231 late (10-16 weeks old) stage of T2D. Four-week-old *db/db* mice were treated daily with  
232 BIBO3304 or placebo over a period of 6 weeks. Interestingly, after 6 weeks of treatment, the  
233 BIBO3304-treated group showed a significantly lower body weight compared to placebo  
234 (**Figure 4A**). While lean mass remained comparable, the observed reduction in body weight in  
235 the BIBO3304-treated group was mostly due to a decrease in fat mass (**Figure 4B and 4C**).  
236 Consistently, the absolute weights of individual fat pads revealed that inguinal fat mass was  
237 significantly lower in the BIBO3304-treated group compared to placebo (**Figure 4D**). The  
238 reduction in body weight observed in the BIBO3304-treated group was not due to changes in  
239 appetite as evidenced by the absence of a significant difference in food intake (**Figure S4A**).  
240 Importantly, fed and fasted blood glucose were significantly lower in BIBO3304-treated mice

241 compared to placebo (**Figure 4E**). BIBO3304-treated mice also exhibited significantly lower  
242 fasted plasma insulin levels (**Figure 4F**), suggesting that the inhibition of Y1 receptor  
243 signalling may improve glucose control via increasing insulin action. Consistently, insulin  
244 tolerance tests revealed that BIBO3304-treated *db/db* mice exhibited a markedly improved  
245 insulin responsiveness, as evidenced by lower blood glucose across the duration of 120-  
246 minutes and when quantified as area under the curve (**Figure 4G**). Although the differences  
247 were not statistically significant, BIBO3304-treated mice displayed modestly improved whole-  
248 body glucose tolerance (**Figure S4B and S4C**). The enhanced insulin responsiveness was  
249 correlated with increased insulin induced Akt phosphorylation in muscle (**Figure 4H**) but not  
250 in the liver or adipose tissue (**Figure S4D**). In line with this, insulin-induced 2DG glucose  
251 uptake was significantly enhanced in extensor digitorum longus (EDL) muscle isolated from  
252 *db/db* mice treated with BIBO3304 for 4 weeks, an effect that was impaired in the placebo  
253 group (**Figure 4I**). Strikingly, human muscle *NPY1R* expression was 3-fold higher in obese  
254 compared to lean subjects (**Figure 4J**). The increased *NPY1R* expression in human vastus  
255 lateralis muscle also exhibited a positive correlation with BMI (Spearman's  $r=0.6291$ ,  
256  $p=0.005$ ) as well as fasting blood glucose levels (Spearman's  $r=0.5273$ ,  $p=0.0245$ ) (**Figure**  
257 **4K and 4L**). Consistently, we show in primary human myotubes that insulin-stimulated  
258 glucose uptake was suppressed significantly by NPY, an effect that was diminished in the  
259 presence of BIBO3304 (**Figure 4M**). Taken together, these results suggest that on the early  
260 onset of T2D, Y1 receptor antagonism attenuates hyperglycaemia which can be attributed to  
261 improved insulin action as a consequence of reduced adiposity and/or directly due to inhibition  
262 of Y1 receptor in muscle.

263

264 While BIBO3304 treatment of late stage diabetic *db/db* mice at 16 weeks of age did not show  
265 any effects on body weights, lean mass, fat mass, fat pads mass and insulin response (**Figure**

266 **S4E-S4I**), and the impaired  $\beta$ -cell compensation in the 16-week-old *db/db* mice became  
267 evident as indicated by a greater than 2.5-fold reduction in serum insulin level as compared  
268 to 10-week-old *db/db* mice ( $11.4 \pm 1.91$  ng/ml in 10-week-old vs.  $4.1 \pm 0.26$  ng/ml in 16-week-  
269 old *db/db* mice,  $n=5-6$ ) (**Figure 4N**). It is of interest that hyperinsulinemia in the early  
270 pathogenesis of T2D was associated with a greater than 60% reduction in *Npy* and *Npy1r*  
271 expression in islets of 8-week-old *db/db* mice when compared to the non-diabetic *db/+* mice  
272 (**Figure S4J**), which further supports an inhibitory role for NPY/Y1R signaling in the  
273 regulation of insulin secretion. More importantly, BIBO3304 treatment led to a significant  
274 enhancement of insulin secretion in response to re-feeding after an overnight fast in the 16-  
275 week-old *db/db* cohort when compared to the placebo group (**Figure 4N**), suggesting an  
276 increase in postprandial-induced insulin secretion. To further investigate whether Y1 receptor  
277 antagonism has also effects on preserving  $\beta$ -cell mass during the transition from  $\beta$ -cell  
278 compensation to failure, pancreases from 16-week-old *db/db* mice treated daily for 6 weeks  
279 with BIBO3304 or placebo were examined. Pancreatic histological analysis revealed that  
280 pancreas weights, pancreatic islet area, islet number, and islet proportion were comparable  
281 between BIBO3304 and placebo treated groups (**Figure S4K-S4N**). However, a significant  
282 increase in the intensity of insulin staining in  $\beta$ -cells was observed in pancreases from  
283 BIBO3304 treated *db/db* mice compared to placebo treated *db/db* mice (**Figure 4O**).  
284 Collectively, these results suggest that Y1 antagonism preserves  $\beta$ -cell insulin content and  
285 secretory capacity, thereby delaying diabetes progression in *db/db* mice.

286

287

288

289

290

## 291 **DISCUSSION**

292 In this study, we demonstrated that the increased NPY and Y1 receptor expression in islets are  
293 associated with reduced insulin secretion in human type 2 diabetes. In addition,  
294 pharmacological inhibition of Y1 receptor signalling under diabetogenic conditions resulted in  
295 improved glucose-stimulated insulin secretion and reduced  $\beta$ -cell death *ex vivo*. Y1 receptor  
296 antagonism with BIBO3304 improved  $\beta$ -cell function and preserved functional  $\beta$ -cell mass,  
297 thereby resulting in better glycaemic control in HFD/STZ-induced diabetic mouse models.  
298 Furthermore, treatment of early-diabetic *db/db* mice with BIBO3304 resulted in reduced  
299 adiposity accompanied by lower fasted and postprandial blood glucose levels due to enhanced  
300 insulin sensitivity and muscle glucose uptake. Importantly, we also showed that administration  
301 of BIBO3304 in severely diabetic *db/db* mice delays diabetes progression through preserving  
302 functional  $\beta$ -cell mass during the transition from  $\beta$ -cell compensation to failure. These findings  
303 extend our previous studies which revealed that inhibition of Y1 receptor signalling improves  
304  $\beta$ -cell function in both rodent and human islets which can be utilised to improve islet  
305 transplantation outcomes and a delayed onset of T1D [20].

306

307 Compared to the critical role of neuronal NPY and its receptor Y1 in the regulation of appetite  
308 and energy metabolism, the role of NPY-Y1 receptor signalling in the regulation of  $\beta$ -cell  
309 function and mass, in particular in human type 2 diabetes, is far less clear. In this study, we  
310 demonstrate that in addition to NPY, its receptor Y1 expression was also upregulated in islets  
311 from subjects with T2D and the augmented islet NPY and Y1 receptor expression is associated  
312 with  $\beta$ -cell dysfunction and failure, thus representing a potential driver of diabetes onset. These  
313 results are in line with studies that showed impaired glucose-stimulated insulin secretion in  $\beta$ -  
314 cell specific NPY overexpressed islets [21]. Indeed, our results further indicate that  
315 pharmacological inhibition of Y1 receptor using BIBO3304 in mouse islets resulted in

316 decreased apoptosis as well as improved  $\beta$ -cell function under various diabetogenic stress  
317 conditions. These results demonstrate the significance of NPY-Y1 receptor signalling  
318 inhibition, which not only enhances insulin secretion but also protects  $\beta$ -cell against apoptosis.

319  
320 More importantly, results from these preclinical proof-of-concept studies revealed that Y1  
321 receptor antagonism with BIBO3304 can act as an insulin sensitiser when  $\beta$ -cells remain  
322 functioning (early pathogenesis of T2D) and prevents  $\beta$ -cell loss at the late stage of T2D. Y1  
323 receptors are G-protein coupled receptors which preferentially associate with  $G_{i/o}$  G-protein  
324 and therefore act in an inhibitory fashion [22]. Intracellular cAMP levels are reduced in target  
325 cells in response to Y1 receptor ligands, whereas cAMP is increased in response to Y1  
326 antagonism [23]. In line with this, a previous study on islets isolated from Y1 receptor knockout  
327 mice found up-regulated cAMP levels [20]. The cAMP signalling-dependent mechanisms have  
328 been identified to play a critical role in improving insulin secretion and  $\beta$ -cell survival in  
329 diabetes [24]. For instance, pharmacological cAMP inducers such as GLP-1 agonist exendin-  
330 4, decreases cytokine- and ER stress-induced impaired  $\beta$ -cell function and apoptosis via a  
331 cAMP-dependent signalling pathway in both rodent and human  $\beta$ -cells [25, 26]. Supporting  
332 this notion, our findings showed that under diabetogenic conditions, islets treated with  
333 BIBO3304 exhibited significant improvement in glucose-stimulated insulin secretion,  
334 suggesting that this is attributed to enhanced intracellular cAMP levels.

335  
336 Most of the known effects of the NPY system in the development of obesity arise from the  
337 central activation of Y1 receptors, where it plays a critical role in the regulation of appetite and  
338 energy homeostasis [9]. Inhibition of Y1 receptors or NPY deficiency in the brain have been  
339 linked to decreased body weight gain and adiposity by decreasing energy intake and increasing  
340 energy expenditure [27, 28]. Our findings revealed that the administration of the non-brain

341 penetrable Y1 receptor antagonist BIBO3304 also resulted in decreased body weight and fat  
342 mass in *db/db* mice in the absence of any alteration in food intake, suggesting that BIBO3304  
343 reduces adiposity by acting on mechanisms other than regulation of appetite centrally. This is  
344 consistent with results from a previous study conducted by Zhang et al., where it was revealed  
345 that conditional knockdown of Y1 receptors in the periphery exhibited a phenotype of reduced  
346 RER, indicating increased lipid oxidation [29]. The underlying mechanisms behind the  
347 increased lipid oxidation under peripheral Y1 antagonism was reportedly associated with  
348 increased levels of carnitine palmitoyltransferase-1 (CPT-1) and upregulation of key enzymes  
349 involved in  $\beta$ -oxidation, consequently increasing the capacity of the mitochondria for lipid  
350 oxidation and transport of fatty acids particularly in the liver and muscle [29].

351

352 In addition to reduced adiposity, BIBO3304 treatment in *db/db* mice also significantly  
353 enhanced insulin responsiveness as demonstrated by increased insulin induced AKT  
354 phosphorylation and insulin-stimulated glucose uptake in skeletal muscle of *db/db* mice and in  
355 primary human muscle cells. The insulin sensitising effect observed in *db/db* mice might be,  
356 at least in part, due to reduced body weight and adiposity or muscle fat content. In addition, in  
357 line with our finding in primary human myotubes, previous studies showed that deficiency of  
358 peripheral Y1 receptor results in increased mitochondrial capacity in muscle [29], supporting  
359 a role of Y1 receptor antagonism acting directly on muscle insulin receptor signalling.  
360 Nonetheless, these results are consistent with the notion that increasing muscle glucose uptake  
361 improves glycaemic control and suggesting that, in addition to reduced adiposity, these effects  
362 may at least in part be responsible for the observed improvement in glucose homeostasis in  
363 BIBO3304 treated *db/db* mice.

364

365 In summary, one unmet clinical need in treating T2D is the availability of therapeutics that  
366 improves glycaemic control by targeting the underlying  $\beta$ -cell dysfunction and failure. As such  
367 the reduced adiposity and improved insulin action seen by the inhibition of NPY/Y1 signalling  
368 *in vivo* highlights a potential therapy of targeting these peripheral Y1 receptor pathways to  
369 preserve functional  $\beta$ -cell mass, which may ultimately provide greater therapeutic benefits in  
370 controlling glucose levels in T2D.

371

372

373

374

375

376

377

378

379

380

381

382

383

384

385

386

387

388

389

390

391 **MATERIALS and METHODS**

392

393 **Key resources table**

394

| REAGENT or RESOURCE                                       | SOURCE                       | IDENTIFIER                    |
|-----------------------------------------------------------|------------------------------|-------------------------------|
| Antibodies                                                |                              |                               |
| Mouse monoclonal anti-ATK<br>(pan) (40D4)                 | Cell Signaling<br>Technology | Cat#: 2920S                   |
| Rabbit monoclonal anti-<br>phospho-AKT (Ser 473)          | Cell Signaling<br>Technology | Cat#: 9271S                   |
| Rabbit monoclonal anti $\beta$ -Actin                     | Cell Signaling<br>Technology | Cat #: 4970; RRID: AB_2223172 |
| Rabbit monoclonal anti-cleaved<br>caspase-3 (Asp175)(5A1) | Cell Signaling<br>Technology | Cat #: 9664S                  |
| Rabbit monoclonal anti-BIM<br>(C34C5)                     | Cell Signaling<br>Technology | Cat #: 2933T                  |
| goat anti-rabbit-HRP antibody                             | Agilent<br>Technologies      | Cat#: P0448                   |
| Goat anti-mouse<br>immunoglobulins/HRP                    | Agilent<br>Technologies      | Cat#:P0447                    |
| Guinea Pig Polyclonal Anti-<br>Insulin                    | Agilent<br>Technologies      | Cat #: IR00261-2              |
| Alexa Fluor 488 Goat Anti-<br>Guine Pig IgG (H+L)         | Life<br>Technologies         | A-11073                       |



|                                                 |                              |                      |
|-------------------------------------------------|------------------------------|----------------------|
| Alexa Fluor 594 Goat anti-Rabbit IgG (H+L)      | Life Technologies            | A11012               |
| Chemicals, Peptides, and Recombinant Proteins   |                              |                      |
| RPMI-1640 cell culture media                    | Sigma-Aldrich                |                      |
| streptozotocin                                  | Sigma-Aldrich                | Cat #: S0130         |
| 1,1-Dimethylbiguanide hydrochloride (Metformin) | Sigma-Aldrich                | Cat #: D150959       |
| BIBO3304 trifluoroacetate                       | Tocris                       | Cat #: 2412          |
| Actrapid (human, Insulin)                       | Novo Nordisk Pharmaceuticals | Cat #:169625         |
| Critical Commercial Assays                      |                              |                      |
| Mouse Insulin ELISA                             | ALPCO Diagnostics            | Cat#: AP80-INSMS-E10 |
| Glucose oxidase assay                           | ThermoFisher                 | Cat#: A22189         |
| Experimental Models: Organisms/Strains          |                              |                      |
| C57BL/6J                                        |                              | C57BL/6J             |
| B6.BKS(D)Lepr <sup>db</sup> /J ( <i>db/db</i> ) |                              | <i>db/db</i>         |
| Oligonucleotides                                |                              |                      |
| <i>NPY</i> TaqMan® Gene Expression Assay        | ThermoFisher                 | Cat #: Hs00173470_m1 |
| <i>PYY</i> TaqMan® Gene Expression Assay        | ThermoFisher                 | Cat #: Hs00373890_g1 |
| <i>PPY</i> TaqMan® Gene Expression Assay        | ThermoFisher                 | Cat #: Hs00358111_g1 |

|                                               |                               |                                                                                                                       |
|-----------------------------------------------|-------------------------------|-----------------------------------------------------------------------------------------------------------------------|
| <i>NPY1R</i> TaqMan® Gene<br>Expression Assay | ThermoFisher                  | Cat #: Hs00702150_s1                                                                                                  |
| <i>NPY2R</i> TaqMan® Gene<br>Expression Assay | ThermoFisher                  | Cat #: Hs01921296_s1                                                                                                  |
| <i>PPYRI</i> TaqMan® Gene<br>Expression Assay | ThermoFisher                  | Cat #: Hs00275980_s1                                                                                                  |
| <i>NPY5R</i> TaqMan® Gene<br>Expression Assay | ThermoFisher                  | Cat #: Hs01883189_s1                                                                                                  |
| <i>RPLP0</i> TaqMan® Gene<br>Expression Assay | ThermoFisher                  | Cat #: Hs99999902_m1                                                                                                  |
| <i>GAPDH</i> TaqMan® Gene<br>Expression Assay | ThermoFisher                  | Cat #: Hs99999905_m1                                                                                                  |
| <i>Ppia</i> TaqMan® Gene<br>Expression Assay  | ThermoFisher                  | Cat #: Mm02342430_g1                                                                                                  |
| <i>Bcl2</i> TaqMan® Gene<br>Expression Assay  | ThermoFisher                  | Cat #: Mm00477631_m1                                                                                                  |
| <i>Bak1</i> TaqMan® Gene<br>Expression Assay  | ThermoFisher                  | Cat #: Mm00432045_m1                                                                                                  |
| AHLIKIN, Lepr TaqMan SNP<br>Assay             | ThermoFisher                  | Cat #: 4332077                                                                                                        |
| Software and Algorithms                       |                               |                                                                                                                       |
| Prism 8.0                                     | Graphpad                      | <a href="https://www.graphpad.com/scientific-software/prism/">https://www.graphpad.com/scientific-software/prism/</a> |
| Image J                                       | GNU General<br>Public License |                                                                                                                       |

395

396

397 **Resource availability**

398 **Lead contact**

399 Further information and requests for reagents may be directed to lead author Dr Chieh-Hsin  
400 Yang ([jyang@svi.edu.au](mailto:jyang@svi.edu.au))

401 **Materials availability**

402 This study did not generate new unique reagents.

403 **Data and code availability**

404 This study did not generate any unique datasets or code.

405

406

407 **Experimental models and subject details**

408 We obtained approval for performing human islet studies from St Vincent's Institute of

409 Medical Research and St. Vincent's Clinical School Human Research Ethics Committee.

410 Consent for use of the islets for research was given by relatives of the donors. All mice care

411 and experiments were performed in accordance with protocols approved by the Animal Ethics

412 Committee at St Vincent's Hospital (AEC No. GBNML 760 and 016/19). Eight-week-old mice

413 were fed a standard chow diet (6% fat) or a high fat diet (23% fat; 45% of total energy from

414 fat; SF04-027; Specialty Feeds) as indicated. B6.BKS(D)Lepr<sup>db</sup>/J (*db*/+) heterozygous mice

415 were kindly provided by A/Prof Ross Laybutt from Garvan Institute of Medical Research

416 (Sydney, NSW, Australia). Routine genotyping for homozygous *db/db* mice was conducted

417 using TaqMan SNP genotyping assay (AHLIKIN, ThermoFisher Scientific). The eight-week-

418 old C57BL/6 male mice were purchased from The Walter and Eliza Hall Institute (Victoria,

419 Australia) for all in vivo studies. To induce T2D, C57BL/6 mice were fed a high fat diet (SF04-

420 027; Specialty Feeds) for 4 weeks from 8 weeks of age, followed by multiple intraperitoneal

421 injections of low-dose streptozotocin (35 mg/kg) (Sigma Aldrich). Streptozotocin was prepared

422 fresh each time in 0.1 M sodium citrate buffer (pH 4.5) and filter sterilised prior to use. Blood

423 glucose level was measured twice a week until blood glucose reached 15 mmol/L and above.  
424 C57BL/6 mice used in islets experiments were bred in house at BioResources Centre (St  
425 Vincent's Hospital). All mice were housed in a temperature-controlled room of 22 °C on a 12  
426 h/12 h light/dark cycle (lights on from 0700-1900 hours) with free access to water and food.

427

## 428 **Method details**

### 429 **Treatment with Y1 receptor antagonist BIBO3304 and metformin**

430 A non-brain penetrable Y1 receptor antagonist BIBO3304 (Tocris Bioscience) was prepared  
431 in Milli Q water at a concentration of 1 mg/ml. C57BL/6 mice (average weight  $27.4 \pm 0.3$  g)  
432 were received 0.5 mg BIBO3304 daily in jelly containing 4.9% (wt/v) gelatine and 7.5% (v/v)  
433 chocolate flavouring essence as described previously [13]. The obese *db/db* mice at 4- (average  
434 weight  $20.3 \pm 0.9$  g) or 12-weeks of age (average weight  $42 \pm 1.3$  g) were given 2.5 mg  
435 BIBO3304 once daily via oral gavage, while control mice on placebo treatment received the  
436 same volume of Milli Q water. Metformin (Sigma Aldrich) was prepared in Milli Q water, and  
437 0.25 g/kg was given daily via oral gavage. The duration of treatment is as stated in the text for  
438 each procedure.

439

### 440 **Metabolic assessment and body composition measures**

441 The effect of Y1 receptor antagonist BIBO3304 on blood glucose control and body weight  
442 were monitored weekly on the same day of the week between 09:00 hours and 10:00 hours.  
443 Random blood glucose was taken from tail tipping and measured on an Accu-Check Performa  
444 glucometer (Roche, Switzerland). For the fast-refeeding experiment, food was removed from  
445 the mice at the dark cycle before the experiment. Blood was collected by retro-orbital bleed  
446 after a 16 h fast as well as 30 minutes after refeeding to determine blood glucose and plasma  
447 insulin levels. Food intake was measured at the same time points (n = 8 per group). Whole

448 body lean mass and fat mass were measured at the end of study using the whole-body  
449 composition analyzer, EchoMRI (Houston, USA).

450

#### 451 ***In vivo* assessment of glucose, insulin and pyruvate tolerance tests**

452 Glucose tolerance tests were performed on 6 h-fasted HFD/STZ mice or overnight fasted *db/db*  
453 mice by intraperitoneal injection of 1 g/kg and 0.5 g/kg glucose, respectively. Insulin tolerance  
454 was measured by intraperitoneal injection of 0.75 i.u./kg and 2.5 i.u./kg human insulin  
455 (Actrapid, Novo Nordisk Pharmaceuticals) on HFD/STZ mice and *db/db* mice after a 6h-fast.  
456 Pyruvate tolerance tests were conducted on mice after an overnight fast with intraperitoneal  
457 injection of 1 g/kg sodium pyruvate. Blood glucose was measured at basal and, 15, 30, 60, 90  
458 and 120 minutes following glucose, insulin or pyruvate administration. The *in vivo* glucose-  
459 stimulated insulin secretion was determined by intravenous glucose tolerance test using 1 g/kg  
460 glucose on overnight fasted HFD/STZ mice as previously described [ref]. Briefly, mice were  
461 anaesthetised and jugular venous catheters were inserted. Mice were allowed to recover for 20  
462 minutes after surgery. A bolus of glucose was given via catheter and blood glucose was  
463 measured at 2, 5, 10, 15 and 30 minutes post glucose administration.

464

#### 465 **Pancreatic islet isolation and culture *ex vivo***

466 Mouse islets were isolated from C57BL/6 and *db/db* mice as previously described [30]. Briefly,  
467 Collagenase P (0.45 mg/mL) (Sigma Aldrich) was injected into the bile duct to distend the  
468 pancreas. After perfusion, pancreas was excised and incubated at 37°C for 15 minutes. Islets  
469 was further purified using Histopaque-1077 gradient (Sigma Aldrich). The isolated mouse  
470 islets were cultured in Connaught Medical Research Laboratories (CMRL) 1066 medium  
471 (Invitrogen, Life Technologies, Carlsbad, CA, USA) supplemented with 10% fetal calf serum,

472 100 U/ml penicillin, 100 mg/ml streptomycin and 2 mmol/L l-glutamine. Isolated islets were  
473 incubated in 37°C, 5% CO<sub>2</sub> humidified incubator.

474

#### 475 **Human islet isolation and culture *ex vivo***

476 Pancreases were obtained from heart-beating, brain-dead donors with consent from next-of-  
477 kin and research approval from the St Vincent's Hospital, Melbourne (HREC-011-04). Human  
478 islets were purified using Ficoll density gradients [31] and cultured in Connaught Medical  
479 Research Laboratories (CMRL) 1066 medium (Invitrogen, Life Technologies, Carlsbad, CA,  
480 USA) supplemented with 10% fetal calf serum, 100 U/ml penicillin, 100 mg/ml streptomycin  
481 and 2 mmol/l l-glutamine. All islets were incubated in a 37°C, 5% CO<sub>2</sub> humidified incubator.  
482 Insulin stimulation index was determined and presented as the ratio of insulin secretion at 28  
483 mmol/l to that of at 2.8 mmol/l from the same islets.

484

#### 485 **Skeletal muscle biopsies from human donors**

486 Eighteen non-diabetic males with an average of  $40.4 \pm 3.9$  years of age, Body Mass Index  
487 (BMI)  $27.7 \pm 1.4$  kg/m<sup>2</sup>, and fasting blood glucose of  $4.9 \pm 0.15$  mmol/L were included. Muscle  
488 samples were acquired from the *vastus lateralis* under local anesthesia (Xylocaine 1%) using  
489 the percutaneous needle biopsy technique with suction. The samples were snap frozen in liquid  
490 nitrogen and stored at -80°C until analyses. The methods for participant recruitment and muscle  
491 biopsy were approved by the Human Research Ethics Committee, Victoria University.

492

#### 493 **Glucose-stimulated insulin secretion in isolated islets**

494 Wild-type C57BL/6 islets were incubated in the respective diabetogenic stressors for the  
495 indicative duration: Inflammation: islets were incubated with proinflammatory cytokine  
496 cocktail (50 ng/ml TNFa, 250 ng/ml IFNg and 25 ng/ml IL1b) for 48 hours; oxidative stress:

497 10 mM H<sub>2</sub>O<sub>2</sub> for 16 hours; ER stress: 1 mM thapsigargin for 24 hours. Following culture, islets  
498 were handpicked and pre-incubated for 1 hour in HEPES-buffered-KREBS buffer containing  
499 0.2% BSA and 2.8 mmol/L D-glucose. Subsequently, 15 size matched islets were incubated at  
500 37°C for another 1 hour in KREBS buffer containing either 2.8 mmol/L or 20 mmol/L D-  
501 glucose, treated with or without 1 μM BIBO3304. Culture medium was collected, and insulin  
502 secretion was assayed using a mouse insulin ELISA kit (ALPCO Diagnostics, Salem, NH,  
503 USA).

504

### 505 **DNA fragmentation assay**

506 To induced islet cell death, wild-type C57BL/6 islets were incubated in the respective  
507 diabetogenic stressors: Inflammation: islets were incubated with proinflammatory cytokine  
508 cocktail (50 ng/ml TNFa, 250 ng/ml IFNg and 25 ng/ml IL1b) for 72 hours; oxidative stress:  
509 70 mM H<sub>2</sub>O<sub>2</sub> for 18 hours; ER stress: 5 mM thapsigargin for 72 hours, glucolipototoxicity: 25  
510 mmol/L glucose plus 0.5 mM palmitate for 96 hours. Cell apoptosis was measured by analysis  
511 of DNA fragmentation as described previously [32]. Briefly, islets in uniform size were  
512 handpicked into 3.5 cm Petri dishes containing the appropriate stimuli to induce apoptosis in  
513 1.5 ml complete CMRL medium. At the end of the culture period, islets were dispersed by  
514 trypsin digestion for 5 min at 37°C, followed by mechanical disruption by pipetting up and  
515 down for 10 times. The dispersed islet cells were then resuspended in 150 ml of Nicoletti buffer  
516 containing 50 mg/ml propidium iodide (Miltenyi Biotec), 0.1% (wt/v) sodium citrate and 0.1%  
517 (v/v) Triton X-100 [33]. The cells were then analyzed on a LSRFortessa Flow Cytometer  
518 (Becton Dickinson, Franklin Lakes, NJ). Cells undergoing apoptosis were identified by their  
519 apparent sub-diploid DNA content as reported previously [34].

520

## 521 **2-Deoxyglucose uptake measurement in EDL muscle**

522 Db/db mice were fasted overnight then euthanised using CO<sub>2</sub> chamber. Left and right EDL  
523 muscles were quickly excised and bathed in carbogenated Krebs-Henseleit buffer (KHB)  
524 (119 mM NaCl, 4.7 mM KCl, 2.5 mM CaCl<sub>2</sub>, 1.2 mM MgSO<sub>4</sub>, 1.2 mM KH<sub>2</sub>PO<sub>4</sub>, 25 mM  
525 NaHCO<sub>3</sub>, pH 7.4, 30 °C) with constant shaking. After 30 min of pre-incubation, muscles were  
526 transferred to fresh carbogenated KHB containing 10 mU/mL insulin (or KHB without insulin  
527 as control) for 30 min. Subsequently, muscles were transferred to fresh KHB containing 2 mM  
528 2-Deoxy-d-[1,2-<sup>3</sup>H]-glucose (0.15 µCi/mL) and 16 mM d-[1-<sup>14</sup>C] mannitol (0.1 µCi/mL) for  
529 15 min. After the incubation, muscles were rapidly rinsed with ice cold KHB buffer, then snap  
530 frozen in liquid nitrogen and stored at -80 °C. Muscle samples were next lysed in ice-cold  
531 radioimmunoprecipitation assay (RIPA) buffer (400 µL/muscle) with protease and  
532 phosphatase inhibitor cocktail (Cell Signalling) using TissueLyser II (QIAGEN). Half of the  
533 lysate was mixed with scintillation cocktail for scintillation counting using Liquid Scintillation  
534 Analyzer (PerkinElmer), and the other half was used for immunoblotting.

535

## 536 **2-Deoxyglucose uptake measurement in human myotubes**

537

538 Three lines of primary human myoblasts originated from skeletal muscle samples of three non-  
539 diabetic male participants (age: 64, 72, and 80 years) were used to assess insulin-stimulated  
540 glucose uptake. Myogenic differentiation of myoblasts was initiated when cells grew to ~80%  
541 confluence in 12-well plates, the growth medium (10 % fetal bovine serum [FBS] in α-MEM)  
542 was replaced with the differentiation medium containing 2 % horse serum in α-MEM. After 5  
543 days of differentiation (Differentiation Medium was refreshed every other day), cells were  
544 treated with/without 0.5 µM NPY and/or 1 µM BIBO3304 in serum-free medium for 24 h.  
545 Following the treatment, cells were stimulated with 100 nM insulin (or without insulin) in  
546 Glucose Uptake Buffer (GUB) (10 mM HEPES, 2.5 mM NaH<sub>2</sub>PO<sub>4</sub>, 150 mM NaCl, 5 mM KCl,



547 1.2 mM CaCl<sub>2</sub>, 1.2 mM MgSO<sub>4</sub>, 0.1% BSA, pH7.4) for 45 min. In the last 15 min of  
548 stimulation, 1 mM 2-Deoxy-d-[1,2-<sup>3</sup>H]-glucose (1 μCi/mL) was spiked into the GUB. After  
549 the incubation, cells were washed three times with ice-cold PBS, then lysed with 0.1 M NaOH  
550 (200 μl/well). 150 μl of the lysate was pipetted into vials with scintillation cocktail for  
551 scintillation counting, and the remaining was used in protein assay for normalisation purpose.

552

### 553 **RNA extraction and quantitative real-time PCR**

554 Total RNA of mouse islets was extracted using RNeasy Plus Mini Kit (Qiagen). Other tissues  
555 including mouse liver, muscle and adipose tissues were excised and snap frozen in liquid  
556 nitrogen, and RNA was isolated using RNAzol Reagent (Sigma, St. Louis, MO) following the  
557 manufacturer's instructions. Isolated mRNA was reverse transcribed into cDNA using the  
558 Superscript IV First-Strand Synthesis System (Invitrogen, Australia) and performed  
559 quantitative real-time PCR with the Light-Cycler 480 Real-Time PCR system (Roche,  
560 Switzerland). Relative gene expression of NPY ligands and receptors was performed under the  
561 assumption that the probes binding efficiency are equal. Human *RPLP0*, *GAPDH* and mouse  
562 *Ppia* were used as housekeeping genes for normalisation as indicated in the text. Primer details  
563 are listed in the Supplementary Table 2. The amplification condition used in all the RT-qPCR  
564 experiment was: 95 °C for 10 min, 95 °C for 15 s, 60 °C for 60 s for 40 cycles. Relative  
565 quantification was determined using the  $2^{-\Delta\Delta C_t}$  method.

566

### 567 **Immunoblotting**

568 200 islets per sample from *db/db* or *db/+* mice were cultured in 3 mL of complete CMRL  
569 medium and treated with or without BIBO3304 (1 μM) for 36 hours. Islets were lysed in ice-  
570 cold RIPA lysis buffer supplemented with protease and phosphatase inhibitor cocktails (Cell  
571 Signalling Technology). Protein concentrations were determined with BCA protein assay

572 (Pierce, Thermo Fisher Scientific). Proteins were resolved in SDS-PAGE gel (4-20% gradient  
573 polyacrylamide gel electrophoresis, Mini-PROTEAN® Precast Gels, Biorad). Blots were  
574 blocked for 1 hour with 5% non-fat dry milk in PBS/0.1% tween-20 (Sigma Aldrich), and  
575 subsequently incubated overnight at 4 °C with respective primary antibodies: pan-AKT  
576 antibody (40D4) (1:2,000; 2920S; Cell Signaling Technology), phospho-AKT (Ser473)  
577 (1:1,000; 9271S; Cell Signaling Technology), BIM (C34C5)(1:1,000; 2933T; Cell Signaling  
578 Technology), cleaved caspas-3 (Asp175)(5A1E) (1:1,000; 9664S; Cell Signaling Technology)  
579 or  $\beta$ -actin (1:2,000; 4970; Cell Signaling Technology). Following incubation, membranes were  
580 washed 3x10 minutes in PBS-T, then incubated with HRP-linked secondary antibodies for 1  
581 hour in 5% milk in PBS-T at room temperature. After 3x10 minutes washes, immunoreactive  
582 signals were visualised using SuperSignal™ West Femto Maximum Sensitivity Substrate  
583 (Thermo Fisher Scientific), then developed using Super RX Fuji X-ray film (Fujifilm, Tokyo  
584 Japan). Protein band intensities were quantified using Image J. Cleaved caspase-3 and BIM  
585 protein signals were normalised against tubulin as a loading control.

586

### 587 **Immunofluorescent staining on pancreatic histochemical analysis**

588 Whole pancreas was excised and fixed in 4% PBS-buffered paraformaldehyde overnight at  
589 room temperature and embedded into paraffin. Slides with 5  $\mu$ m thick pancreas sections were  
590 deparaffinized using Histolene (Trajan Scientific, Australia), rehydrated with ethanol (100%,  
591 100%, 90%, 70%), and blocked in 10% FBS in PBS for 30 minutes at room temperature.  
592 Subsequently, sections were incubated for 2 hours at room temperature with polyclonal guinea  
593 pig anti-insulin antibody (1:5, Agilent Technologies). Slides were then washed 3 x 5 minutes  
594 with PBS and incubated with the Anti-guinea pig IgG Alexa Fluor 488 (1:200, Life  
595 Technologies) diluted in 10% FBS for 1 hour at room temperature. The resulting slides were  
596 then mounted in a mounting medium containing DAPI. Slides were scanned at 20x

597 magnification using 3D Histech Panoramic SCAN II slide Scanner (Phenomics Australia  
598 Histopathology and Slide Scanning Service, University of Melbourne). For  $\beta$ -cell mass  
599 measurement, Islets were outlined manually on the digital images. Islet area and islet number  
600 were analysed using digital image processing software Image Scope (Aperio). Two sections  
601 separated by at least 150  $\mu$ m was used for each mouse (n=8 per treatment). Cell mass of  
602 pancreatic  $\beta$ -cells was determined as the product of wet pancreas weight and the ratio of insulin  
603 positive/total pancreas area.

604

### 605 **Hepatic glucose production assay**

606 Primary hepatocytes were isolated from C57BL/6 mice at 8 weeks of age and plated at a density  
607 of  $1 \times 10^6$  cells in 6-well plates with the plating medium (Williams' E medium supplemented  
608 with 10% fetal bovine serum, 1% penicillin-streptomycin and 1% of L-glutamine) for 4 hours  
609 followed by starvation overnight in low glucose DMEM supplemented 1% L-glutamine and  
610 1% Penicillin-Streptomycin. The following day, cells were pre-treated treated with/without 0.5  
611 mM NPY and/or 1 mM BIBO3304 for 1 hour. Subsequently, the cells were washed once with  
612 PBS, and the assay medium (DMEM without glucose, 1% penicillin-streptomycin, 2 mM of  
613 sodium pyruvate, 20 mM sodium lactate, pH 7.4) was added with/without 0.5 mM NPY and/or  
614 1 mM BIBO3304 for 6 hours. Glucose production was assayed with the Amplex Red glucose  
615 assay kit (Invitrogen), and cell lysate was used in protein assay for normalisation.

616

### 617 **Statistical analysis**

618 All data are presented as mean  $\pm$  SEM. A Student's *t*-test was conducted to test difference  
619 between two groups of mice. Restricted randomisation was used to achieve treatment group  
620 with similar numbers of mice. Sample size was estimated on previously published studies of  
621 our and other's research groups [13, 14, 35, 36]. Differences among groups of mice were

622 assessed by two-way ANOVA or repeated-measures ANOVA. Correlation coefficient was  
623 calculated using Spearman's rank correlation coefficient. Statistical analyses were assessed  
624 using Prism software 8.0. All experiments requiring the use of animals or animals to derive  
625 cells were subject to randomization based on litter. Differences were regarded as statistically  
626 significant if  $*P < 0.05$ ;  $**P < 0.01$ ;  $***P < 0.001$ ;  $****P < 0.0001$ .

627

628

629

630

631

632

633

634

635

636

637

638

639

640

641

642

643

644

645

646

647 **ACKNOWLEDGEMENTS**

648 This work was supported by the National Health and Medical Research Council (NHMRC) of  
649 Australia in the form of a project grant #1158242 to KL. This work was also supported by a  
650 Diabetes Australia Project grant (Y19G-LOHK) and Australia Diabetes Society Skip-Martin  
651 Fellowships to KL. Supported in part by the Victorian Government's Operational Infrastructure  
652 Support Program. We thank all organ donors and their families, Donatelife and the staff of St  
653 Vincent's Institute involved in the human islet isolation program.

654

655

656

657 **AUTHOR CONTRIBUTIONS**

658 C.H.Y, D.A.O, X.Z.L, S.N, S.F and E.P, designed and performed research and contributed  
659 discussion, C.H.Y, J.W.S, J.O, S.G, Y.S contributed discussion and reviewed manuscript.  
660 A.M-A and C.S contributed to research experiments and reviewed manuscript. T.L, I.L, R.D.L,  
661 H.H contributed discussion and edited manuscript. H.E.T and K.L contributed discussion,  
662 wrote manuscript, reviewed/edited manuscript. All authors read and approved the final  
663 manuscript.

664

665

666 **DECLARATION OF INTERESTS**

667 The authors declare no competing interests.

668

669

670

671

672

## 673 **THE PAPER EXPLAINED**

### 674 **Problem**

675 Loss of functional  $\beta$ -cell mass is a key factor contributing to poor glycaemic control in  
676 advanced type 2 diabetes. Hence, one of the most pressing unmet medical needs in type 2  
677 diabetes is the development of new therapeutics that provide  $\beta$ -cell protective effects, such as  
678 improvement of  $\beta$ -cell function, mass and survival. Improved understanding of diabetes  
679 pathophysiology and the identification of a new biochemical pathway that regulates  $\beta$ -cell  
680 function and mass will be extremely valuable for the development of more effective therapeutic  
681 approaches for diabetes.

### 682 **Results**

683 In this study, we demonstrated that the increased NPY and Y1 receptor expression in islets  
684 from patient with type 2 diabetes correlated with reduced  $\beta$ -cell function. Importantly, in a  
685 preclinical study, pharmacological inhibition of neuropeptide Y1 receptors by BIBO3304, a  
686 selective orally bioavailable neuropeptide Y1 receptor antagonist, significantly improved  $\beta$ -  
687 cell function and preserved  $\beta$ -cell mass, thereby resulting in better glycaemic control.  
688 Furthermore, Y1 receptor antagonist BIBO3304 exhibited similar efficacy to attenuate  
689 hyperglycaemia when compared with a first-line oral anti-diabetic drug, metformin.  
690 Collectively, these results demonstrate that inhibition of Y1 receptor by BIBO3304 represents  
691 a potential  $\beta$ -cell protective therapy for improving functional  $\beta$ -cell mass and glycaemic control  
692 in type 2 diabetes.

### 693 **Impacts**

694 This research is the first to uncover a novel causal link of increased islet NPY-Y1 receptor  
695 signaling to  $\beta$ -cell dysfunction and failure in human type 2 diabetes, contributing to the  
696 understanding of the pathophysiology of type 2 diabetes. These novel findings provide  
697 preclinical proof-of-concept for improving functional  $\beta$ -cell mass and resulting in better  
698 glycaemic control by targeting the NPY-Y1 receptor pathway. Findings from the current  
699 studies provide a significant conceptual advance that could have translational potential for  
700 improving treatment of type 2 diabetes.

701

## 702 REFERENCES

- 703 1. Wild, S., et al., *Global prevalence of diabetes: estimates for the year 2000 and*  
704 *projections for 2030*. *Diabetes Care*, 2004. **27**(5): p. 1047-53.
- 705 2. Cole, J.B. and J.C. Florez, *Genetics of diabetes mellitus and diabetes complications*.  
706 *Nat Rev Nephrol*, 2020. **16**(7): p. 377-390.
- 707 3. Harding, J.L., et al., *Global trends in diabetes complications: a review of current*  
708 *evidence*. *Diabetologia*, 2019. **62**(1): p. 3-16.
- 709 4. Weir, G.C. and S. Bonner-Weir, *Five stages of evolving beta-cell dysfunction during*  
710 *progression to diabetes*. *Diabetes*, 2004. **53** **Suppl 3**: p. S16-21.
- 711 5. Atkinson, M.A., G.S. Eisenbarth, and A.W. Michels, *Type 1 diabetes*. *Lancet*, 2014.  
712 **383**(9911): p. 69-82.
- 713 6. Batista, T.M., N. Haider, and C.R. Kahn, *Defining the underlying defect in insulin*  
714 *action in type 2 diabetes*. *Diabetologia*, 2021. **64**(5): p. 994-1006.
- 715 7. Hanley, S.C., et al., *{beta}-Cell mass dynamics and islet cell plasticity in human type 2*  
716 *diabetes*. *Endocrinology*, 2010. **151**(4): p. 1462-72.
- 717 8. Hummasti, S. and G.S. Hotamisligil, *Endoplasmic reticulum stress and inflammation*  
718 *in obesity and diabetes*. *Circ Res*, 2010. **107**(5): p. 579-91.
- 719 9. Loh, K., H. Herzog, and Y.C. Shi, *Regulation of energy homeostasis by the NPY system*.  
720 *Trends Endocrinol Metab*, 2015. **26**(3): p. 125-35.
- 721 10. Yang, C.H., et al., *Regulation of Pancreatic beta-cell Function by the NPY System*.  
722 *Endocrinology*, 2021.
- 723 11. Rodnoi, P., et al., *Neuropeptide Y expression marks partially differentiated beta cells*  
724 *in mice and humans*. *JCI Insight*, 2017. **2**(12).
- 725 12. Imai, Y., et al., *Insulin secretion is increased in pancreatic islets of neuropeptide Y-*  
726 *deficient mice*. *Endocrinology*, 2007. **148**(12): p. 5716-23.
- 727 13. Loh, K., et al., *Inhibition of Y1 receptor signaling improves islet transplant outcome*.  
728 *Nat Commun*, 2017. **8**(1): p. 490.
- 729 14. Loh, K., et al., *Y1 receptor deficiency in beta-cells leads to increased adiposity and*  
730 *impaired glucose metabolism*. *Sci Rep*, 2018. **8**(1): p. 11835.
- 731 15. Laybutt, D.R., et al., *Endoplasmic reticulum stress contributes to beta cell apoptosis in*  
732 *type 2 diabetes*. *Diabetologia*, 2007. **50**(4): p. 752-63.
- 733 16. Gerber, P.A. and G.A. Rutter, *The Role of Oxidative Stress and Hypoxia in Pancreatic*  
734 *Beta-Cell Dysfunction in Diabetes Mellitus*. *Antioxid Redox Signal*, 2017. **26**(10): p.  
735 501-518.
- 736 17. Eizirik, D.L. and M.L. Colli, *Revisiting the role of inflammation in the loss of*  
737 *pancreatic beta-cells in T1DM*. *Nat Rev Endocrinol*, 2020. **16**(11): p. 611-612.
- 738 18. Campbell, J.E. and C.B. Newgard, *Mechanisms controlling pancreatic islet cell*  
739 *function in insulin secretion*. *Nat Rev Mol Cell Biol*, 2021. **22**(2): p. 142-158.
- 740 19. King, A.J., *The use of animal models in diabetes research*. *Br J Pharmacol*, 2012.  
741 **166**(3): p. 877-94.
- 742 20. Loh, K., et al., *Inhibition of Y1 receptor signaling improves islet transplant outcome*.  
743 *Nature Communications*, 2017. **8**(1): p. 490.
- 744 21. Machida, Y., et al., *Pancreatic islet neuropeptide Y overexpression has minimal effect*  
745 *on islet morphology and beta-cell adaptation to high-fat diet*. *Endocrinology*, 2014.  
746 **155**(12): p. 4634-40.
- 747 22. Michel, M.C., et al., *XVI. International Union of Pharmacology recommendations for*  
748 *the nomenclature of neuropeptide Y, peptide YY, and pancreatic polypeptide receptors*.  
749 *Pharmacol Rev*, 1998. **50**(1): p. 143-50.

- 750 23. Nieuwenhuizen, A.G., et al., *Mechanisms underlying the insulinostatic effect of peptide*  
751 *YY in mouse pancreatic islets*. Diabetologia, 1994. **37**(9): p. 871-878.
- 752 24. Yang, H. and L. Yang, *Targeting cAMP/PKA pathway for glycemic control and type 2*  
753 *diabetes therapy*. J Mol Endocrinol, 2016. **57**(2): p. R93-r108.
- 754 25. Cunha, D.A., et al., *Glucagon-like peptide-1 agonists protect pancreatic beta-cells*  
755 *from lipotoxic endoplasmic reticulum stress through upregulation of BiP and JunB*.  
756 Diabetes, 2009. **58**(12): p. 2851-2862.
- 757 26. Yusta, B., et al., *GLP-1 receptor activation improves  $\beta$  cell function and survival*  
758 *following induction of endoplasmic reticulum stress*. Cell Metabolism, 2006. **4**(5): p.  
759 391-406.
- 760 27. Bannon, A.W., et al., *Behavioral characterization of neuropeptide Y knockout mice*.  
761 Brain Research, 2000. **868**(1): p. 79-87.
- 762 28. Erickson, J.C., G. Hollopeter, and R.D. Palmiter, *Attenuation of the obesity syndrome*  
763 *of ob/ob mice by the loss of neuropeptide Y*. Science, 1996. **274**(5293): p. 1704-7.
- 764 29. Zhang, L., et al., *Peripheral neuropeptide Y Y1 receptors regulate lipid oxidation and*  
765 *fat accretion*. International Journal of Obesity, 2010. **34**(2): p. 357-373.
- 766 30. Aston-Mourney, K., et al., *Increased nicotinamide nucleotide transhydrogenase levels*  
767 *predispose to insulin hypersecretion in a mouse strain susceptible to diabetes*.  
768 Diabetologia, 2007. **50**(12): p. 2476-85.
- 769 31. Ricordi, C., et al., *Automated method for isolation of human pancreatic islets*. Diabetes,  
770 1988. **37**(4): p. 413-20.
- 771 32. McKenzie, M.D., et al., *Glucose induces pancreatic islet cell apoptosis that requires*  
772 *the BH3-only proteins Bim and Puma and multi-BH domain protein Bax*. Diabetes,  
773 2010. **59**(3): p. 644-52.
- 774 33. Riccardi, C. and I. Nicoletti, *Analysis of apoptosis by propidium iodide staining and*  
775 *flow cytometry*. Nat Protoc, 2006. **1**(3): p. 1458-61.
- 776 34. Nicoletti, I., et al., *A rapid and simple method for measuring thymocyte apoptosis by*  
777 *propidium iodide staining and flow cytometry*. J Immunol Methods, 1991. **139**(2): p.  
778 271-9.
- 779 35. Loh, K., et al., *Insulin controls food intake and energy balance via NPY neurons*. Mol  
780 Metab, 2017. **6**(6): p. 574-584.
- 781 36. Loh, K., et al., *Inhibition of Adenosine Monophosphate-Activated Protein Kinase-3-*  
782 *Hydroxy-3-Methylglutaryl Coenzyme A Reductase Signaling Leads to*  
783 *Hypercholesterolemia and Promotes Hepatic Steatosis and Insulin Resistance*. Hepatol  
784 Commun, 2019. **3**(1): p. 84-98.

785

786

787

788

789

790

791

792



793

## 794 **FIGURE LEGENDS**

795 **Figure 1. Increased NPY and Y1 receptor mRNA expression levels negatively correlate**  
796 **with islet stimulation index in T2D.**

797 (A) *NPY*, *PYY* and *PPY* mRNA expression in human pancreatic islets from non-diabetic and  
798 T2D subjects relative to the *NPY* expression in non-diabetic group. Subject numbers: non-  
799 diabetic = 25 and type 2 diabetic = 11. (B) Y-receptor expression profiles in human pancreatic  
800 islets from non-diabetic and T2D subjects relative to the *NPY2R* expression in the non-diabetic  
801 group. Subject numbers: non-diabetic = 25 and type 2 diabetic = 11. (C-D) Correlation between  
802 the insulin stimulation index or HbA1C and the expression of *NPY* mRNA (delta CT values)  
803 in human islets of subjects with T2D and non-diabetic control subjects. Total subjects = 9. (E-  
804 F) Correlation between the insulin stimulation index or HbA1C and the expression of *NPY1R*  
805 mRNA (delta CT values) in human islets of subjects with T2D and non-diabetic control  
806 subjects. Total subjects = 10. (G-H) Correlation between the insulin stimulation index or  
807 HbA1C and the expression of *NPY5R* mRNA (delta CT values) in human islets of subjects  
808 with T2D and non-diabetic control subjects. Total subjects = 11. (A-B) Data are mean  $\pm$  SEM.  
809 *P* values by two-tailed t-test when comparing non-diabetic vs diabetic. (C-H) *P* values by two-  
810 tailed Spearman correlation analysis.

811

812 **Figure 2. Pharmacological inhibition of Y1 receptor restores  $\beta$ -cell function and protects**  
813 **against  $\beta$ -cell death under diabetogenic conditions.**

814 (A-B) Pancreatic islets from C57BL/6 mice were isolated and cultured in the corresponding  
815 diabetogenic conditions: inflammatory cytokine cocktail of 25 ng/ml IL-1 $\beta$ , 250 ng/ml IFN $\gamma$ ,  
816 50 ng/ml TNF $\alpha$   $\pm$  1  $\mu$ M of BIBO3304 for 48h (*n* = 5), thapsigargin (1  $\mu$ M)  $\pm$  1  $\mu$ M of  
817 BIBO3304 for 24h (*n* = 3-6) (*n* = 3). Glucose-stimulated insulin secretion was determined in

818 response to 2.8 and 20 mmol/L glucose. (C-E) DNA fragmentation in response to  
819 inflammation, ER stress and oxidative stress was measured by flow cytometry. Representative  
820 FACS profiles are shown and the results are representative of islets from a minimum of 3 mice  
821 per group. (F-G) Western blot analyses of pro-apoptotic proteins BIM and cleaved caspase-3  
822 in isolated islets from 10-week-old leptin receptor-deficient *db/db* mice were cultured  
823 with/without 1  $\mu$ M of BIBO3304 for 36h.  $\alpha$ -tubulin was used as the loading control ( $n = 3-4$ ).  
824 Results shown are a representative blot and quantitative densitometry analysis. Data are mean  
825  $\pm$  SEM. \* $P < 0.05$ , \*\* $P < 0.01$ , calculated by unpaired Student's *t*-test.

826

827 **Figure 3. Y1 receptor antagonist BIBO3304 improves glycemia in HFD/STZ-induced**  
828 **diabetes mice.**

829 (A) Schematic diagram of treatment regimen. C57BL/6 mice were fed on a high fat diet for 4  
830 weeks and rendered diabetic by multiple low-dose of STZ injections (6 doses, 35mg/kg).  
831 Diabetic mice were randomized to receive placebo, oral Y1 antagonist BIBO3304 or  
832 metformin for 6 weeks. Metabolic and glucose homeostasis parameters were examined  
833 thereafter. (B) Non-fasted blood glucose levels at the indicated time points were measured from  
834 placebo and BIBO3304 treated mice.  $n = 8$  per group. (C) Six-hour and overnight fasted blood  
835 glucose levels.  $n = 7-8$  per group. (D) Urine glucose levels.  $n = 6-7$  per group. (E) Non-fasting  
836 blood glucose levels at the indicated time points were measured from placebo, BIBO3304 or  
837 metformin treated mice. Results expressed as area under the curve.  $n = 4-6$  per group. (F)  
838 Intraperitoneal glucose tolerance tests (1 g/kg body weight) on 6 h fasted diabetic mice treated  
839 with placebo or BIBO3304 for 4 weeks. Blood glucose levels during glucose tolerance tests  
840 were monitored and results are expressed over the time course and as area under the curve.  $n$   
841  $= 8$  per group. (G-H) Diabetic mice treated with placebo or BIBO3304 were fasted overnight  
842 or 6 h and i.p. pyruvate tolerance tests (1 g/kg body weight) or insulin sensitivity tests (0.75

843 i.u./kg body weight) were performed, respectively. Blood glucose levels during tolerance tests  
844 were monitored and results are expressed over the time course and as area under the curve.  $n$   
845 = 6-8 per group. (I) Plasma insulin levels throughout intravenous glucose tolerance tests (1  
846 g/kg body weight) from mice treated with placebo or BIBO3304.  $n$  = 5-6 per group. (J)  
847 C57BL/6 mice were rendered diabetic by multiple high-dose of STZ injections (6 doses, 50  
848 mg/kg body weight). Non-fasted blood glucose levels at the indicated time points were  
849 measured from placebo and BIBO3304 treated mice.  $n$  = 5-6 per group. (K) Sections of  
850 pancreas from placebo or BIBO3304 treated mice were stained for insulin (green) and nuclear  
851 counterstained with DAPI (blue). (L-N) Islet number, islet size and islet proportion were  
852 determined across three non-consecutive pancreatic sections per mouse and normalized to total  
853 pancreas section area.  $n$  = 5-6 per group. Data are mean  $\pm$  SEM. \* $P$  < 0.05, \*\* $P$  < 0.01;  
854 calculated by unpaired Student's  $t$ -test or two-way ANOVA analysis.

855

856 **Figure 4. Y1 receptor antagonist BIBO3304 improves hyperglycemia, insulin sensitivity**  
857 **and preserves functional  $\beta$ -cell mass in *db/db* mice.**

858 Four-week-old leptin receptor deficient *db/db* mice were randomized to receive placebo or oral  
859 Y1 antagonist BIBO3304 for 6 weeks. (A) Weekly body weight of *db/db* mice treated with  
860 placebo or oral BIBO3304 ( $n$  = 4-6 per group). (B-C) Whole body lean and fat mass as  
861 determined by EchoMRI analysis in *db/db* mice treated with placebo or oral BIBO3304 ( $n$  = 7  
862 per group). (D) Dissected weights of individual white adipose tissue from epididymal (Epi),  
863 inguinal (Ing) and brown adipose tissue (BAT) ( $n$  = 4-5 per group). (E) Fed and fasted blood  
864 glucose levels in *db/db* mice treated with placebo or oral BIBO3304 ( $n$  = 5-6 per group). (F)  
865 Fasting plasma insulin levels in *db/db* mice treated with placebo or oral BIBO3304 ( $n$  = 6-8  
866 per group). (G) *db/db* mice treated with placebo or BIBO3304 were fasted 6h or overnight and  
867 intraperitoneal insulin tolerance tests (2.5 i.u./kg body weight) were performed. Blood glucose

868 levels during tolerance tests were monitored and results are expressed over the time course and  
869 as area under the curve. (n = 5 per group). (H-I) EDL muscle isolated from *db/db* mice treated  
870 with placebo or BIBO3304, and insulin-stimulated glucose uptake and Akt activation were  
871 determined. The muscle homogenates were subjected to SDS-PAGE and western blot analysis  
872 using anti-phospho Ser 473 Akt, total Akt and  $\beta$ -actin antibodies ( $n = 5-6$ ). Results shown are  
873 a representative blot and quantitative densitometry analysis. The cropped gel is used in the  
874 figure and full-length gel is presented in Supplemental Figure S4C. (J) *NPY1R* expression in  
875 human muscle from lean (BMI < 25) and overweight/obese (BMI > 25) subjects. Subject  
876 numbers: lean = 7 and overweight/obese = 11. (K-L) Correlation between the fasting blood  
877 glucose or BMI and the expression of *NPY1R* mRNA (delta CT values) in human muscle of  
878 obese and lean control subjects. Total subjects = 18. (M) Primary human muscle cells ( $n = 3$ )  
879 were cultured and insulin-stimulated glucose uptake was determined following the treatment  
880 with NPY (Leu31, Pro34) or NPY+Y1 receptor antagonist BIBO3304. Results were presented  
881 as percentage increase from basal, and data are the average of 3 independent experiments. (N)  
882 Four- and ten-week-old leptin receptor deficient *db/db* mice were randomized to receive  
883 placebo or oral Y1 antagonist BIBO3304 for 6 weeks. Fasted and re-fed serum insulin levels  
884 were measured ( $n = 5-8$  per group). (O) Pancreases from placebo or BIBO3304 treated mice at  
885 16 weeks of age were weighed and fixed in formalin and processed for immunostaining of  
886 insulin (green) and nuclear counterstained with DAPI (blue). Insulin intensity was determined  
887 by screening 138 and 172 islets on placebo and BIBO3304 treated pancreatic sections,  
888 respectively. Insulin intensity was presented as insulin positive pixel normalized to the islet  
889 area. Data are means  $\pm$  SEM \* $P < 0.05$ , \*\* $P < 0.01$ ; calculated by unpaired Student's *t*-test or  
890 two-way ANOVA analysis.

891  
892  
893  
894

895  
896  
897

## SUPPLEMENTAL FIGURE LEGENDS

898 **Supplemental Figure 1. Correlation between the stimulation index, HbA1c or BMI and**  
899 **the islet NPY system expression in type 2 diabetes.**

900 (A-C) Correlation between BMI and the expression of *NPY*, *NPY1R* and *NPY5R* mRNA in  
901 human islets of subjects with type 2 diabetes and non-diabetic control subjects. Total subjects  
902 = 34. (D-F) Correlation between the insulin stimulation index, BMI or HbA1C and the  
903 expression of *PYY* mRNA in human islets of subjects with type 2 diabetes and non-diabetic  
904 control subjects. Analysis was done with a total number of 9 subjects for stimulation index, 36  
905 subjects for BMI and 11 subjects for HbA1C. (G-I) Correlation between the insulin stimulation  
906 index, BMI or HbA1C and the expression of *PYY* mRNA in human islets of subjects with type  
907 2 diabetes and non-diabetic control subjects. Total number of 10 subjects in stimulation index,  
908 36 subjects in BMI and 11 subjects in HbA1C. Data are mean  $\pm$  SEM. *P* values by two-tailed  
909 Spearman's correlation analysis.

910

911 **Supplemental Figure 2. Glucose stimulated insulin secretion and cell death analysis in Y1**  
912 **receptor antagonist treated islets under glucolipotoxicity and oxidative stress conditions.**

913 (A) Pancreatic islets from C57BL/6 mice were isolated and cultured. Islets were exposed to 25  
914 mmol/L glucose and 0.5 mM palmitate  $\pm$  1  $\mu$ M of BIBO3304 for 96h or 10  $\mu$ M H<sub>2</sub>O<sub>2</sub>  $\pm$  1  $\mu$ M  
915 of BIBO3304 for 16h (*n* = 3). Glucose-stimulated insulin secretion was determined in response  
916 to 2.8 and 20 mmol/L glucose. (B) DNA fragmentation in response to glucolipotoxicity (25  
917 mmol/L glucose and 0.5 mM palmitate  $\pm$  1  $\mu$ M of BIBO3304 for 72h) was measured by flow  
918 cytometry. Representative FACS profiles are shown and the results are representative of islets  
919 from a minimum of *n*=3 individual mice per group. Data are mean  $\pm$  SEM. \**P* < 0.05,  
920 \*\**P* < 0.01, calculated by unpaired Student's *t*-test.

921

922 **Supplemental Figure 3. Y1 receptor antagonist BIBO3304 treatment did not alter**  
923 **adiposity, food intake or hepatic glucose production in HFD/STZ-induced diabetes mice.**

924 C57BL/6 mice were fed a high fat diet for 4 weeks and rendered diabetic by multiple low-dose  
925 STZ injections (6 doses, 35mg/kg). Diabetic mice were randomized to receive placebo or oral  
926 Y1 antagonist BIBO3304 for 4 weeks. Metabolic and glucose homeostasis parameters were  
927 examined thereafter. (A) Body weight of HFD/STZ-induced diabetes mice treated with placebo  
928 or oral BIBO3304 (n = 6-8 per group). (B-E) Whole body lean and fat mass as determined by  
929 EchoMRI analysis in placebo or oral BIBO3304 treated HF/STZ mice (n = 6-8 per group). (F-  
930 G) Dissected weights of individual white adipose tissue from epididymal (Epi) and inguinal  
931 (Ing) (n = 6-8 per group). (H) Daily food intake of HFD/STZ-induced diabetes mice treated  
932 with placebo or oral BIBO3304 (n = 6-8 per group). (I) Hepatocytes were isolated and glucose  
933 production was performed in the presence of NPY, BIBO3304 or NPY+BIBO3304 (n = 6-8  
934 per group). (J) Dissected weights of pancreas from HFD/STZ-induced diabetes mice treated  
935 with placebo or oral BIBO3304 (n = 6-8 per group). Data are means  $\pm$  SEM. \* $P < 0.05$ ,  
936 \*\* $P < 0.01$ ; calculated by unpaired Student's *t*-test.

937

938 **Supplemental Figure 4. Metabolic and glucose homeostasis parameters in *db/db* mice**  
939 **treated with BIBO3304.**

940 Four-week-old leptin receptor deficient *db/db* mice were randomized to receive placebo or oral  
941 Y1 antagonist BIBO3304 for 6 weeks. (A) Daily food intake of *db/db* mice treated with placebo  
942 or oral BIBO3304 (n = 5-6 per group). (B-C) *db/db* mice treated with placebo or BIBO3304  
943 were fasted overnight, and intraperitoneal glucose tolerance tests (0.5 g/kg body weight) were  
944 performed. Blood glucose levels during tolerance tests were monitored and results are  
945 expressed over the time course and as area under the curve. (n = 5-6 per group). (D) Livers and

946 white adipose tissues were isolated from 10-week-old *db/db* mice treated with placebo or  
947 BIBO3304 and Akt activation were determined. Tissues were subjected to SDS-PAGE and  
948 western blot analysis using anti-Akt phosphorylation Ser 473, and  $\beta$ -actin antibodies ( $n = 5-6$ ).  
949 Results shown are a representative blot and quantitative densitometry analysis. (E-G) Ten-  
950 week-old leptin receptor deficient *db/db* mice were randomized to receive placebo or oral Y1  
951 antagonist BIBO3304 for 6 weeks. Weekly body weights were determined. Whole body lean  
952 and fat mass as determined by EchoMRI analysis in placebo or oral BIBO3304 treated *db/db*  
953 mice ( $n = 4-6$  per group). (H) Dissected weights of individual white adipose tissue from  
954 epididymal (Epi), inguinal (Ing) and brown adipose tissue (BAT) ( $n = 4-5$  per group). (I) *db/db*  
955 mice treated with placebo or BIBO3304 were fasted overnight and intraperitoneal insulin  
956 tolerance tests (2.5i.u./kg body weight) were performed. Blood glucose levels during tolerance  
957 tests were monitored and results are expressed over the time course and as area under the curve.  
958 ( $n = 4-6$  per group). (J) *Npy* and *Npy1r* mRNA expression in islets from 10-week-old *db/db*  
959 and *db/+* ( $n=3-10$ ). (K-N) Pancreases from placebo or BIBO3304 treated mice were weighed  
960 and fixed in formalin and processed for immunostaining of insulin (green) and nuclear  
961 counterstained with DAPI (blue). Islet number, islet area and islet proportion were determined  
962 across two non-consecutive pancreatic sections per mouse and normalized to total pancreas  
963 section area.  $n = 4-6$  per group. Data are means  $\pm$  SEM. \* $P < 0.05$ , \*\* $P < 0.01$ ; calculated by  
964 unpaired Student's *t*-test or two-way ANOVA analysis.  
965

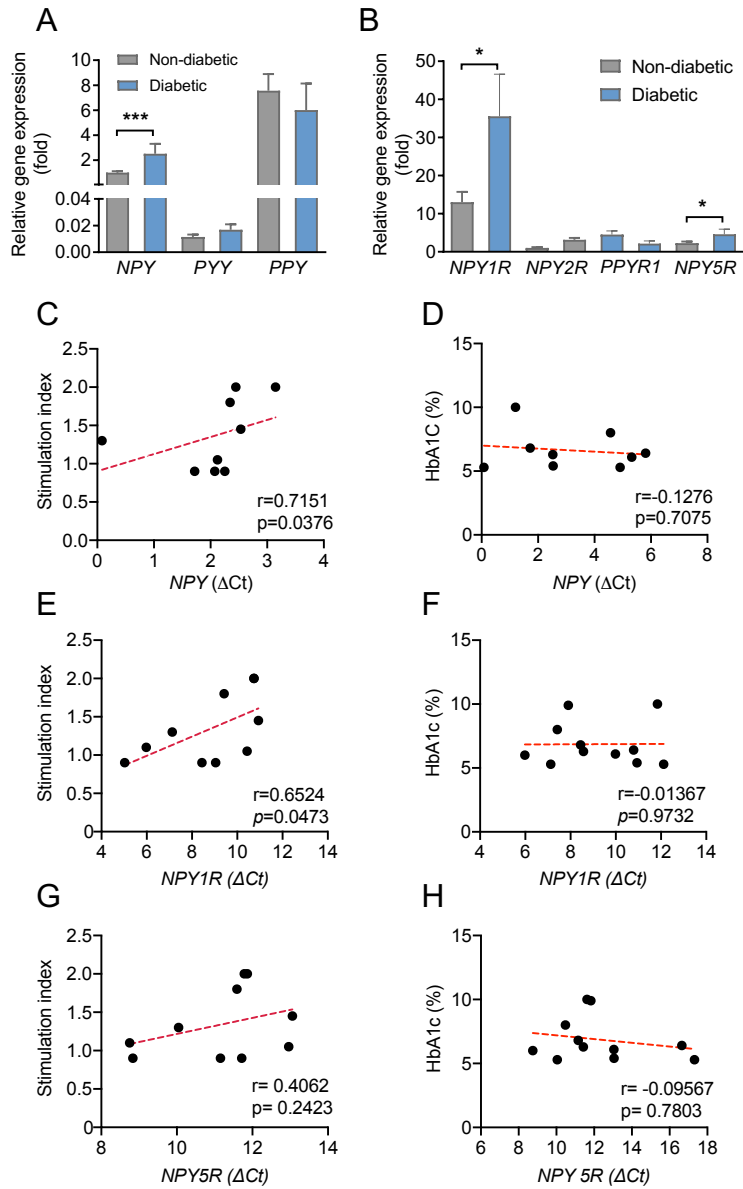

Figure 1



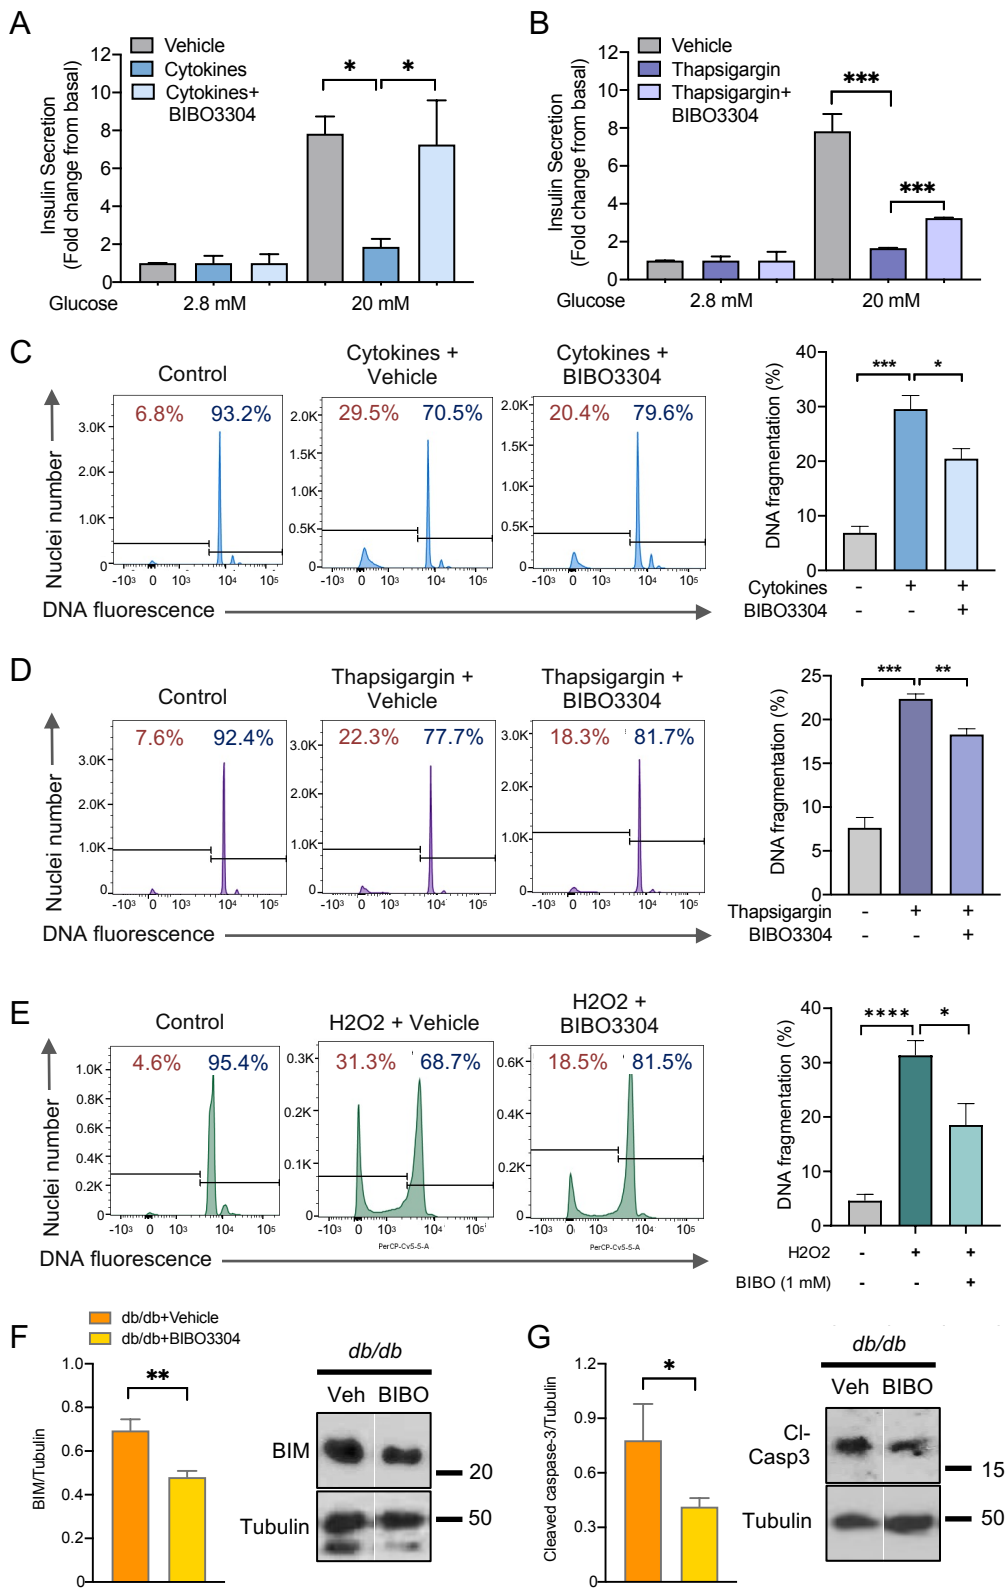

Figure 2

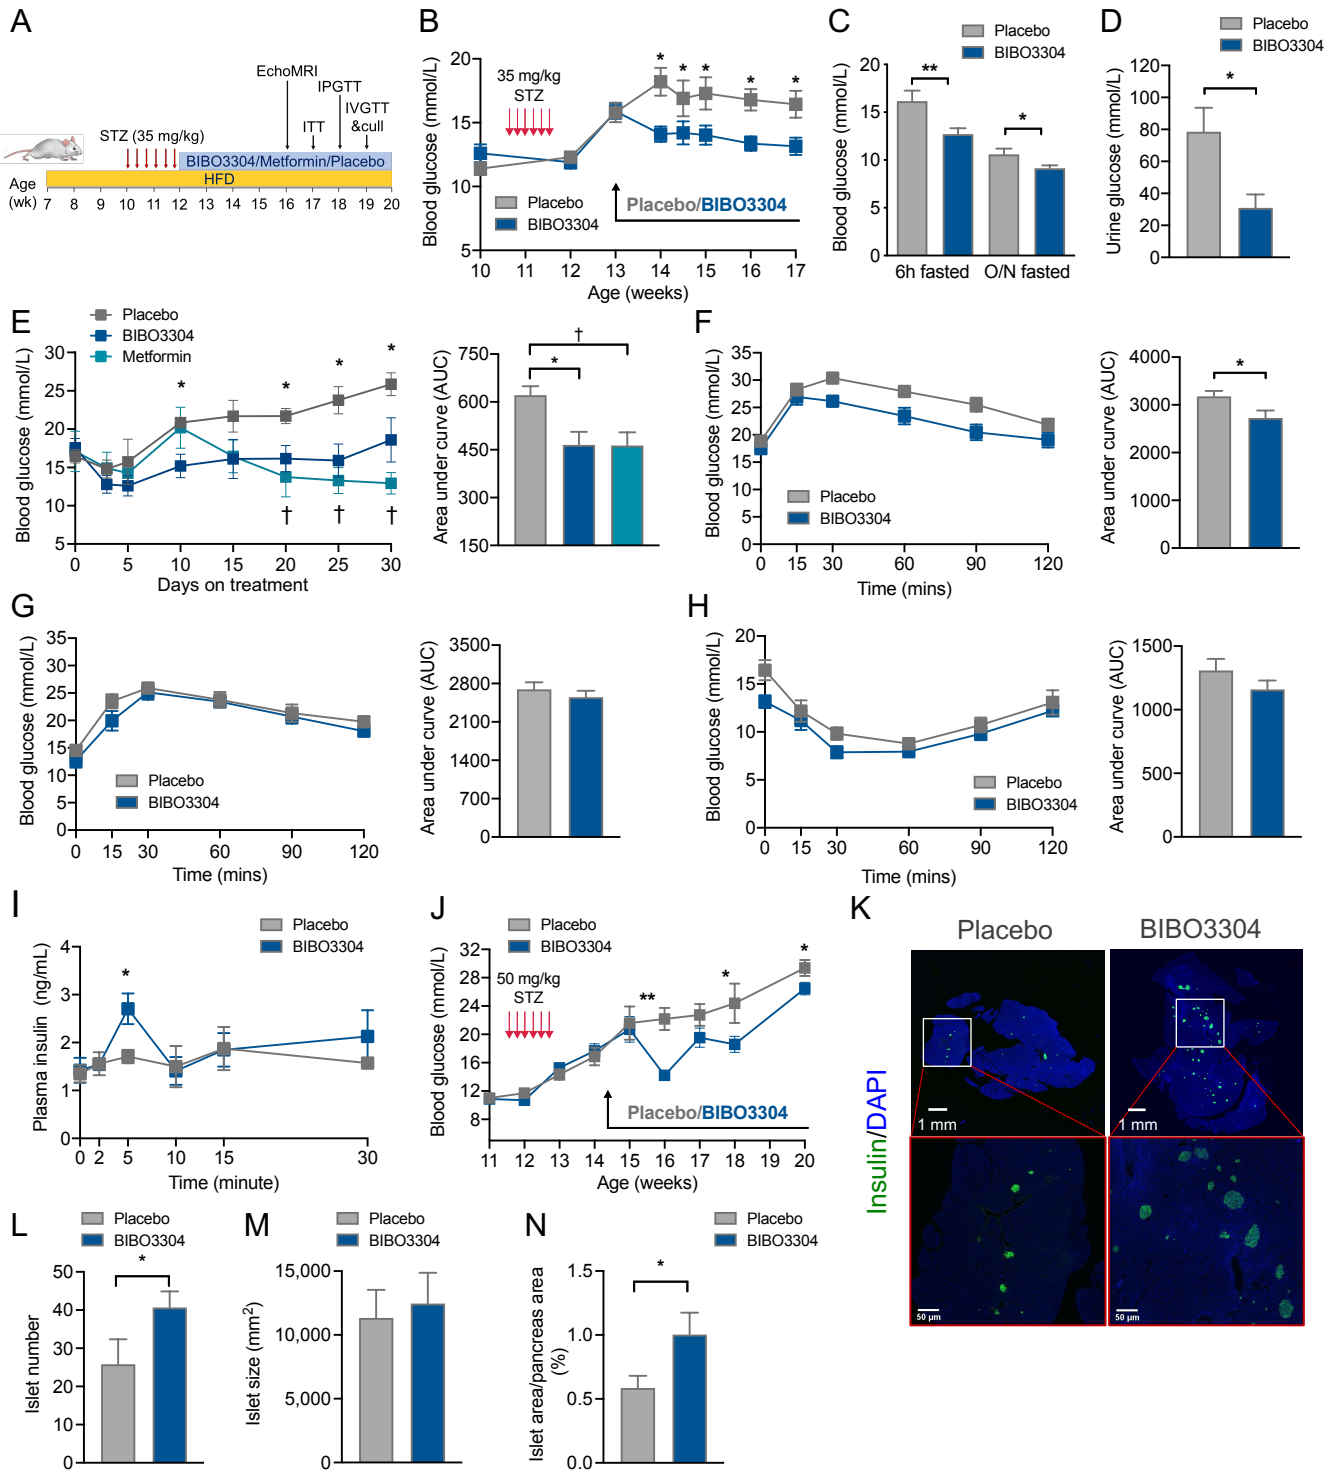

Figure 3

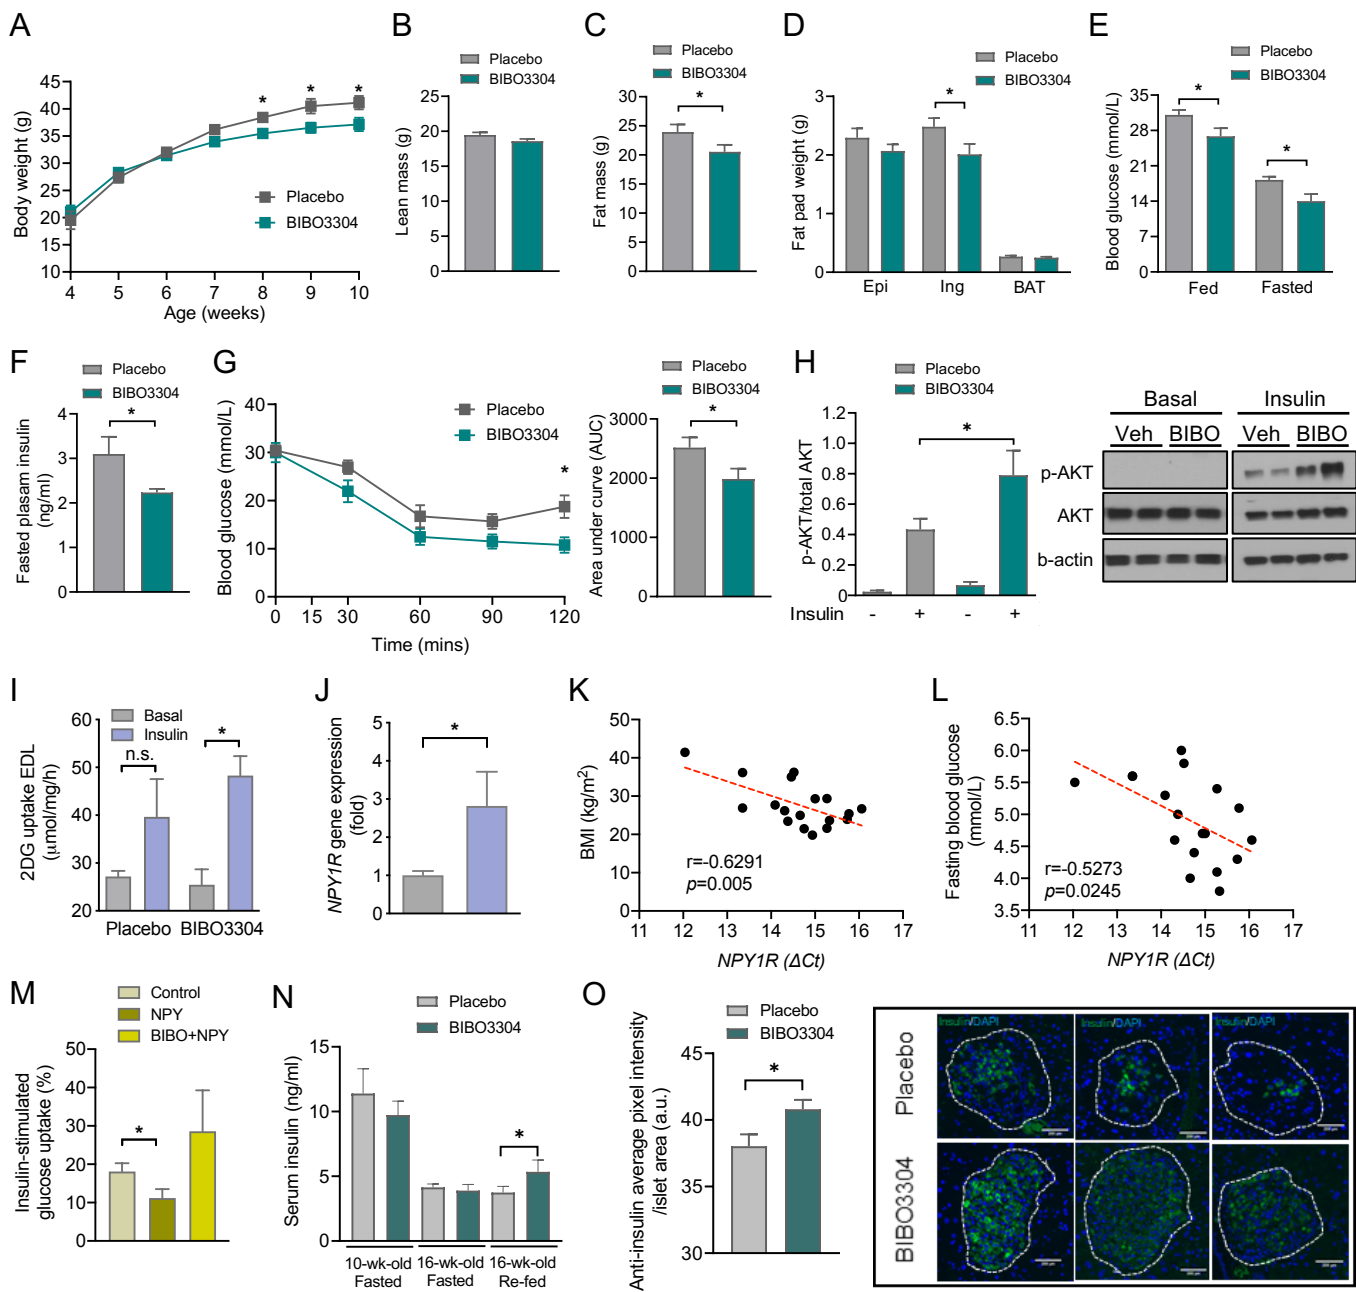

Figure 4

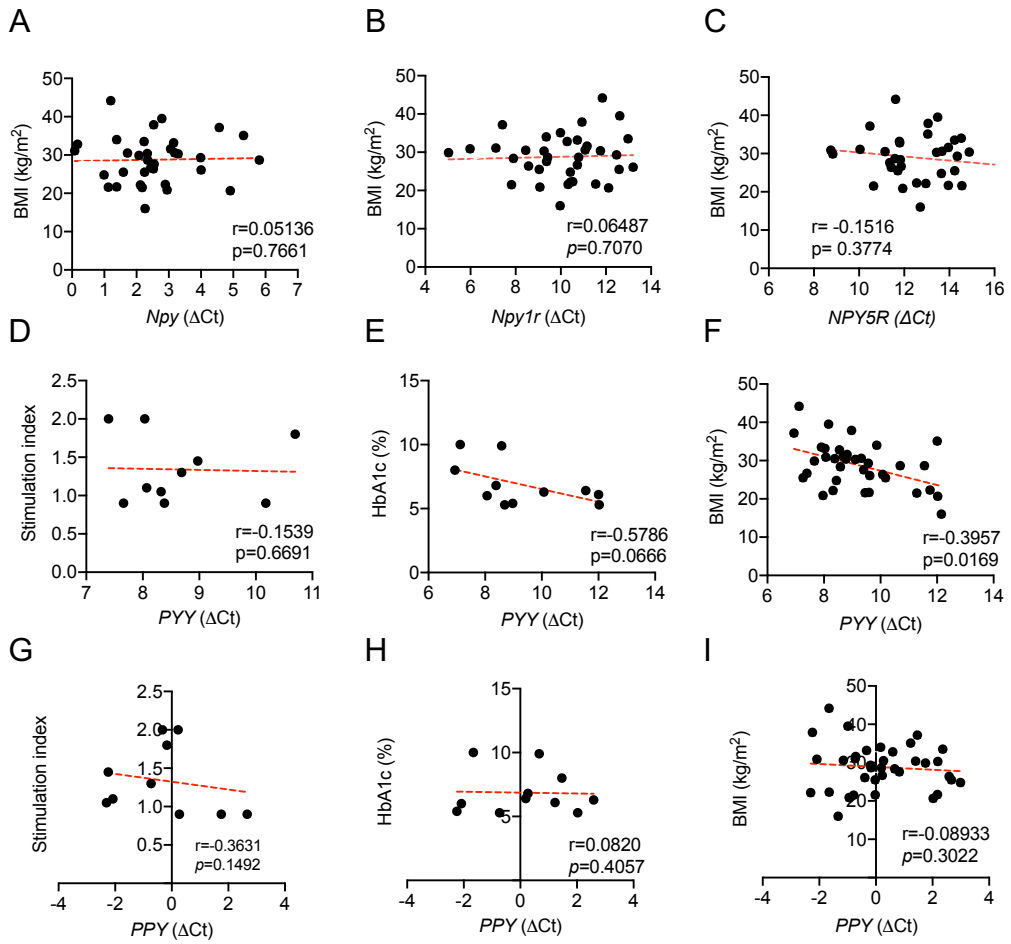

A

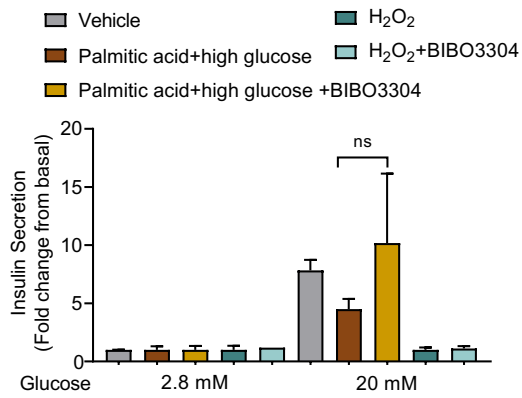

B

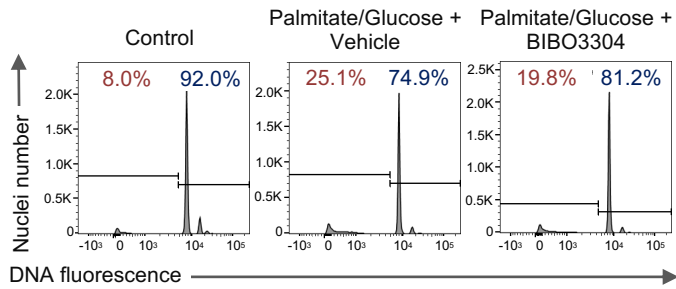

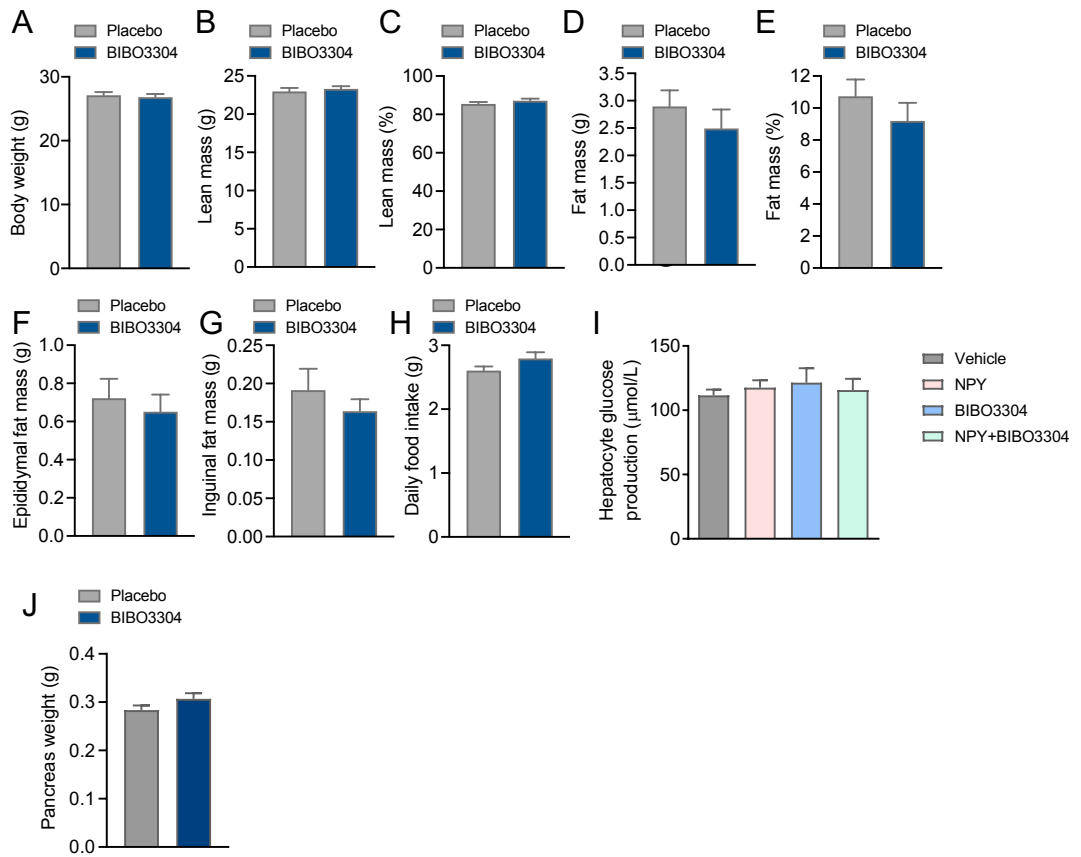

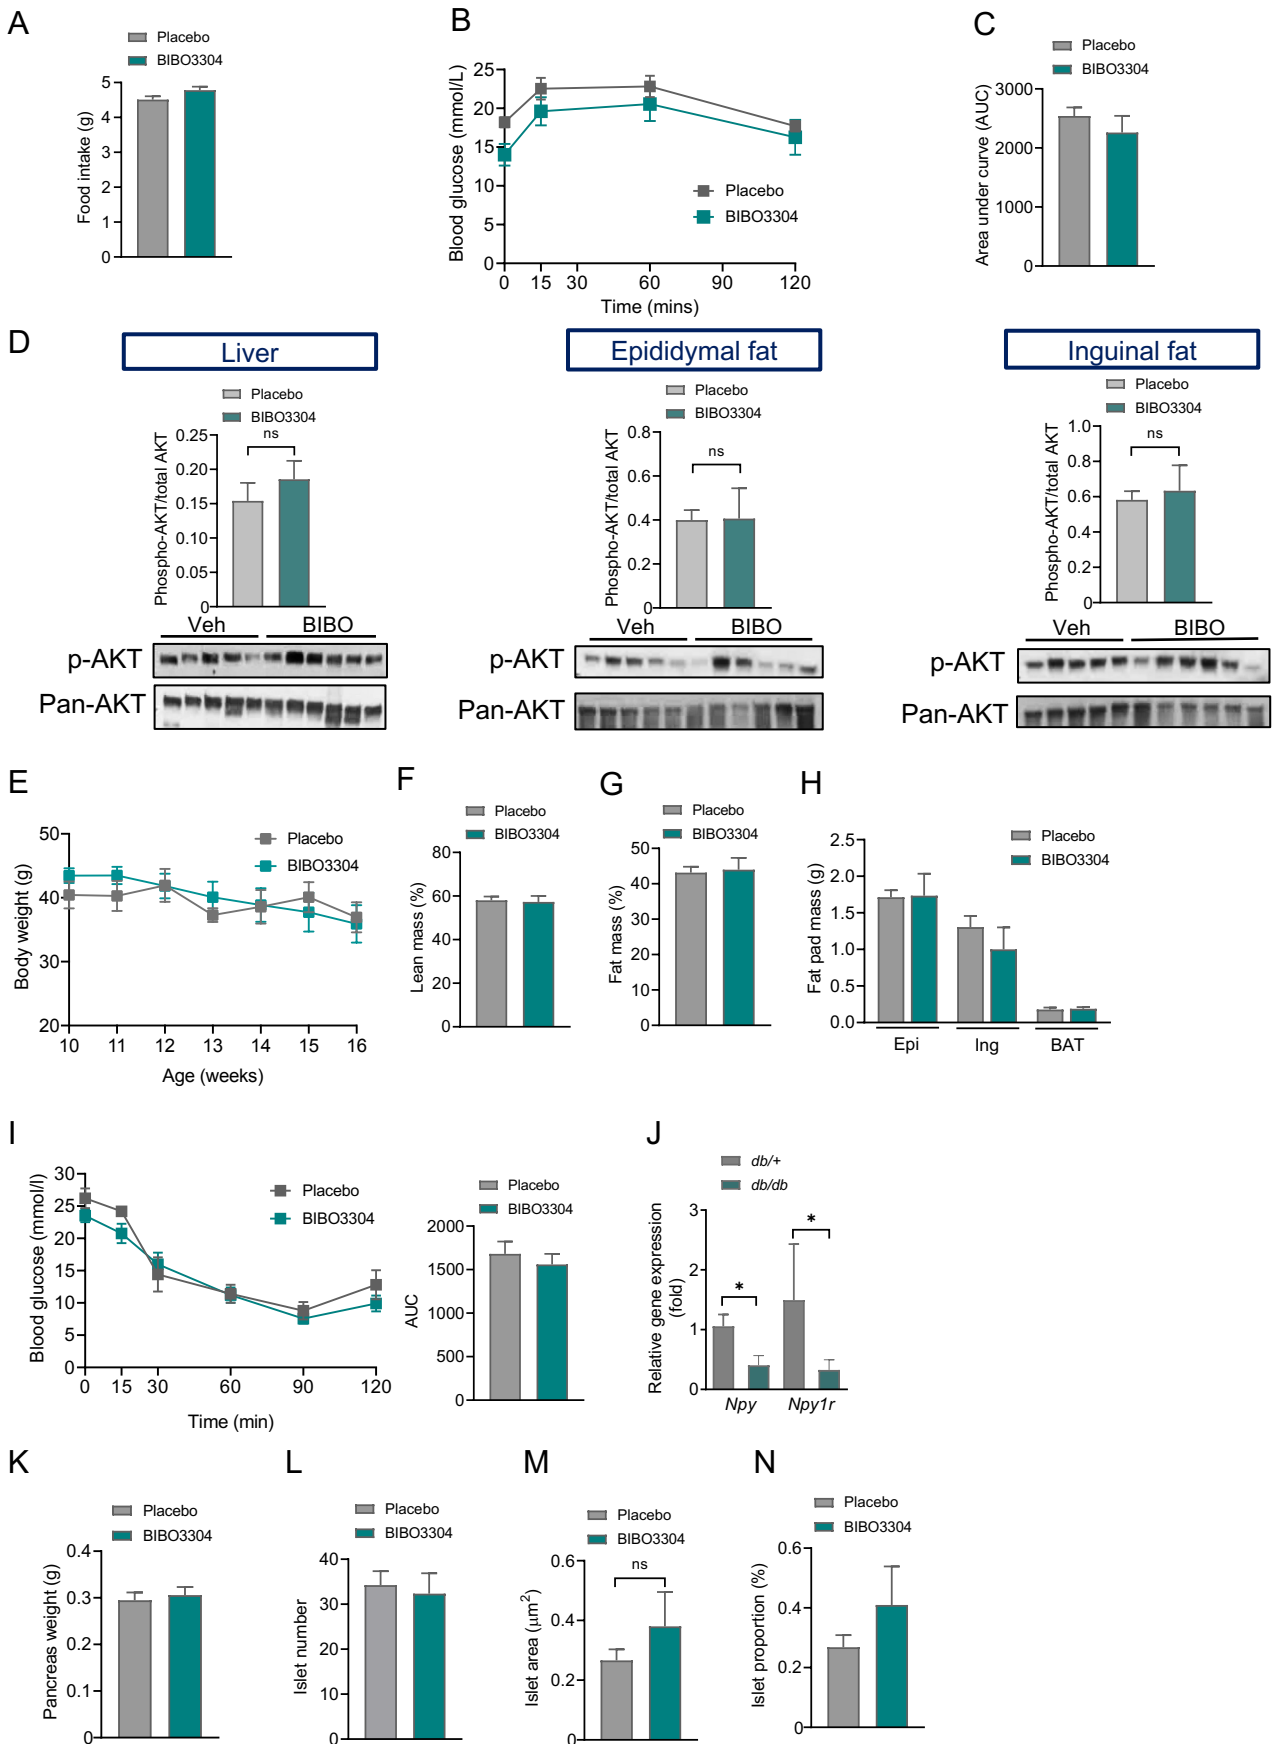

Supplemental Figure 4
